# Supplementary material for: Signal contribution of distant areas to cosmic-ray neutron sensors – implications on footprint and sensitivity
Source: Copernicus journal article supplement (doi:10.5194/egusphere-2022-219), 2022-04-25
Supplement: Supplementary file 1 [file Supplement-S1.pdf › Supplement-S1.pdf]

# Supplements of: Signal contribution of distant areas to cosmic-ray neutron sensors – implications on footprint and sensitivity

Martin Schrön<sup>1</sup>, Markus Köhli<sup>2</sup>, and Steffen Zacharias<sup>1</sup>

<sup>1</sup>UFZ – Helmholtz Centre for Environmental Research GmbH, Leipzig, Germany

<sup>2</sup>University of Heidelberg, Heidelberg, Germany

**Correspondence:** Martin Schrön, martin.schroen@ufz.de

## Data table for the case of a wetting remote field

Input and output quantities:

1. Air humidity,  $h$  (g/m<sup>3</sup>),  
values: 1, 5, 10, 15
- 5 2. Main field soil moisture  $\theta_1$  (m<sup>3</sup>/m<sup>3</sup>),  
values: 0.01, 0.05, ..., 0.50 in steps of 0.05.
3. Difference in soil moisture  $\Delta\theta$  (m<sup>3</sup>/m<sup>3</sup>),  
values: 0.025, 0.05, 0.10, 0.15, 0.20
4. Remote field soil moisture  $\theta_2$  (m<sup>3</sup>/m<sup>3</sup>),  
10 values:  $\theta_2 = \theta_1 + \Delta\theta$
5. Relative precision threshold  $\sigma_N$  (–),  
values: 0.01, 0.02, 0.03
6. Estimated neutrons main field  $N_1$  (cph)
7. Estimated effective neutrons  $\hat{N}$  (cph)
- 15 8. Estimated effective soil moisture  $\hat{\theta}$  (m<sup>3</sup>/m<sup>3</sup>)
9. Minimal distance  $R$  (m)
10. Conventional footprint radius  $R_{86}$  (m)

| $h$ (g/m <sup>3</sup> ) | $\theta_1$ (m <sup>3</sup> /m <sup>3</sup> ) | $\Delta\theta$ (m <sup>3</sup> /m <sup>3</sup> ) | $\theta_2$ (m <sup>3</sup> /m <sup>3</sup> ) | $\sigma_N$ (-) | $N_1$ (cph) | $\hat{N}$ (cph) | $\hat{\theta}$ (m <sup>3</sup> /m <sup>3</sup> ) | $R$ (m) | $R_{86}$ (m) |
|-------------------------|----------------------------------------------|--------------------------------------------------|----------------------------------------------|----------------|-------------|-----------------|--------------------------------------------------|---------|--------------|
| 1                       | 0.010                                        | 0.025                                            | 0.035                                        | 0.02           | 1941        | 1902            | 0.011                                            | 128.9   | 224          |
| 1                       | 0.010                                        | 0.025                                            | 0.035                                        | 0.03           | 1941        | 1883            | 0.012                                            | 92.5    | 224          |
| 1                       | 0.010                                        | 0.050                                            | 0.060                                        | 0.01           | 1941        | 1921            | 0.011                                            | 223.7   | 224          |
| 1                       | 0.010                                        | 0.050                                            | 0.060                                        | 0.02           | 1941        | 1902            | 0.011                                            | 160.6   | 224          |
| 1                       | 0.010                                        | 0.050                                            | 0.060                                        | 0.03           | 1941        | 1883            | 0.012                                            | 123.6   | 224          |
| 1                       | 0.010                                        | 0.100                                            | 0.110                                        | 0.01           | 1941        | 1921            | 0.011                                            | 245.6   | 224          |
| 1                       | 0.010                                        | 0.100                                            | 0.110                                        | 0.02           | 1941        | 1902            | 0.011                                            | 183.2   | 224          |
| 1                       | 0.010                                        | 0.100                                            | 0.110                                        | 0.03           | 1941        | 1883            | 0.012                                            | 146.1   | 224          |
| 1                       | 0.010                                        | 0.150                                            | 0.160                                        | 0.01           | 1941        | 1921            | 0.011                                            | 255.2   | 224          |
| 1                       | 0.010                                        | 0.150                                            | 0.160                                        | 0.02           | 1941        | 1902            | 0.011                                            | 193.3   | 224          |
| 1                       | 0.010                                        | 0.150                                            | 0.160                                        | 0.03           | 1941        | 1883            | 0.012                                            | 156.1   | 224          |
| 1                       | 0.010                                        | 0.200                                            | 0.210                                        | 0.01           | 1941        | 1921            | 0.011                                            | 261.0   | 224          |
| 1                       | 0.010                                        | 0.200                                            | 0.210                                        | 0.02           | 1941        | 1902            | 0.011                                            | 199.4   | 224          |
| 1                       | 0.010                                        | 0.200                                            | 0.210                                        | 0.03           | 1941        | 1883            | 0.012                                            | 162.3   | 224          |
| 1                       | 0.050                                        | 0.025                                            | 0.075                                        | 0.01           | 1314        | 1301            | 0.052                                            | 106.9   | 230          |
| 1                       | 0.050                                        | 0.025                                            | 0.075                                        | 0.02           | 1314        | 1288            | 0.054                                            | 47.4    | 230          |
| 1                       | 0.050                                        | 0.025                                            | 0.075                                        | 0.03           | 1314        | 1275            | 0.056                                            | 17.5    | 229          |
| 1                       | 0.050                                        | 0.050                                            | 0.100                                        | 0.01           | 1314        | 1301            | 0.052                                            | 153.3   | 230          |
| 1                       | 0.050                                        | 0.050                                            | 0.100                                        | 0.02           | 1314        | 1288            | 0.054                                            | 88.7    | 230          |
| 1                       | 0.050                                        | 0.050                                            | 0.100                                        | 0.03           | 1314        | 1275            | 0.056                                            | 54.3    | 229          |
| 1                       | 0.050                                        | 0.100                                            | 0.150                                        | 0.01           | 1314        | 1301            | 0.052                                            | 191.9   | 230          |
| 1                       | 0.050                                        | 0.100                                            | 0.150                                        | 0.02           | 1314        | 1288            | 0.054                                            | 125.3   | 230          |
| 1                       | 0.050                                        | 0.100                                            | 0.150                                        | 0.03           | 1314        | 1275            | 0.056                                            | 88.2    | 229          |
| 1                       | 0.050                                        | 0.150                                            | 0.200                                        | 0.01           | 1314        | 1301            | 0.052                                            | 210.5   | 230          |
| 1                       | 0.050                                        | 0.150                                            | 0.200                                        | 0.02           | 1314        | 1288            | 0.054                                            | 143.7   | 230          |
| 1                       | 0.050                                        | 0.150                                            | 0.200                                        | 0.03           | 1314        | 1275            | 0.056                                            | 105.7   | 229          |
| 1                       | 0.050                                        | 0.200                                            | 0.250                                        | 0.01           | 1314        | 1301            | 0.052                                            | 222.3   | 230          |
| 1                       | 0.050                                        | 0.200                                            | 0.250                                        | 0.02           | 1314        | 1288            | 0.054                                            | 155.4   | 230          |
| 1                       | 0.050                                        | 0.200                                            | 0.250                                        | 0.03           | 1314        | 1275            | 0.056                                            | 117.0   | 229          |
| 1                       | 0.100                                        | 0.025                                            | 0.125                                        | 0.01           | 1083        | 1072            | 0.104                                            | 51.5    | 220          |
| 1                       | 0.100                                        | 0.025                                            | 0.125                                        | 0.02           | 1083        | 1061            | 0.108                                            | 4.6     | 217          |
| 1                       | 0.100                                        | 0.025                                            | 0.125                                        | 0.03           | 1083        | 1051            | 0.111                                            | 0.2     | 217          |
| 1                       | 0.100                                        | 0.050                                            | 0.150                                        | 0.01           | 1083        | 1072            | 0.104                                            | 100.0   | 220          |
| 1                       | 0.100                                        | 0.050                                            | 0.150                                        | 0.02           | 1083        | 1061            | 0.108                                            | 42.0    | 217          |
| 1                       | 0.100                                        | 0.050                                            | 0.150                                        | 0.03           | 1083        | 1050            | 0.112                                            | 13.3    | 217          |
| 1                       | 0.100                                        | 0.100                                            | 0.200                                        | 0.01           | 1083        | 1072            | 0.104                                            | 146.8   | 220          |
| 1                       | 0.100                                        | 0.100                                            | 0.200                                        | 0.02           | 1083        | 1061            | 0.108                                            | 82.8    | 217          |
| 1                       | 0.100                                        | 0.100                                            | 0.200                                        | 0.03           | 1083        | 1050            | 0.112                                            | 49.3    | 217          |
| 1                       | 0.100                                        | 0.150                                            | 0.250                                        | 0.01           | 1083        | 1072            | 0.104                                            | 171.6   | 220          |
| 1                       | 0.100                                        | 0.150                                            | 0.250                                        | 0.02           | 1083        | 1061            | 0.108                                            | 105.7   | 217          |
| 1                       | 0.100                                        | 0.150                                            | 0.250                                        | 0.03           | 1083        | 1050            | 0.112                                            | 70.0    | 217          |
| 1                       | 0.100                                        | 0.200                                            | 0.300                                        | 0.01           | 1083        | 1072            | 0.104                                            | 187.7   | 220          |
| 1                       | 0.100                                        | 0.200                                            | 0.300                                        | 0.02           | 1083        | 1061            | 0.108                                            | 121.0   | 217          |
| 1                       | 0.100                                        | 0.200                                            | 0.300                                        | 0.03           | 1083        | 1050            | 0.112                                            | 84.2    | 217          |
| 1                       | 0.150                                        | 0.025                                            | 0.175                                        | 0.01           | 969         | 959             | 0.156                                            | 20.3    | 198          |
| 1                       | 0.150                                        | 0.025                                            | 0.175                                        | 0.02           | 969         | 950             | 0.161                                            | 0.3     | 198          |
| 1                       | 0.150                                        | 0.025                                            | 0.175                                        | 0.03           | 969         | 949             | 0.162                                            | 0.2     | 198          |
| 1                       | 0.150                                        | 0.050                                            | 0.200                                        | 0.01           | 969         | 959             | 0.156                                            | 64.5    | 198          |
| 1                       | 0.150                                        | 0.050                                            | 0.200                                        | 0.02           | 969         | 949             | 0.161                                            | 15.2    | 198          |
| 1                       | 0.150                                        | 0.050                                            | 0.200                                        | 0.03           | 969         | 940             | 0.168                                            | 1.3     | 194          |
| 1                       | 0.150                                        | 0.100                                            | 0.250                                        | 0.01           | 969         | 959             | 0.156                                            | 111.7   | 198          |
| 1                       | 0.150                                        | 0.100                                            | 0.250                                        | 0.02           | 969         | 949             | 0.161                                            | 53.7    | 198          |
| 1                       | 0.150                                        | 0.100                                            | 0.250                                        | 0.03           | 969         | 940             | 0.168                                            | 24.6    | 194          |
| 1                       | 0.150                                        | 0.150                                            | 0.300                                        | 0.01           | 969         | 959             | 0.156                                            | 138.6   | 198          |
| 1                       | 0.150                                        | 0.150                                            | 0.300                                        | 0.02           | 969         | 949             | 0.161                                            | 77.0    | 198          |
| 1                       | 0.150                                        | 0.150                                            | 0.300                                        | 0.03           | 969         | 940             | 0.168                                            | 45.2    | 194          |
| 1                       | 0.150                                        | 0.200                                            | 0.350                                        | 0.01           | 969         | 959             | 0.156                                            | 156.7   | 198          |

| $h$ (g/m <sup>3</sup> ) | $\theta_1$ (m <sup>3</sup> /m <sup>3</sup> ) | $\Delta\theta$ (m <sup>3</sup> /m <sup>3</sup> ) | $\theta_2$ (m <sup>3</sup> /m <sup>3</sup> ) | $\sigma_N$ (-) | $N_1$ (cph) | $\hat{N}$ (cph) | $\hat{\theta}$ (m <sup>3</sup> /m <sup>3</sup> ) | $R$ (m) | $R_{86}$ (m) |
|-------------------------|----------------------------------------------|--------------------------------------------------|----------------------------------------------|----------------|-------------|-----------------|--------------------------------------------------|---------|--------------|
| 1                       | 0.150                                        | 0.200                                            | 0.350                                        | 0.02           | 969         | 949             | 0.161                                            | 93.3    | 198          |
| 1                       | 0.150                                        | 0.200                                            | 0.350                                        | 0.03           | 969         | 940             | 0.168                                            | 59.8    | 194          |
| 1                       | 0.200                                        | 0.025                                            | 0.225                                        | 0.01           | 895         | 886             | 0.207                                            | 4.8     | 179          |
| 1                       | 0.200                                        | 0.025                                            | 0.225                                        | 0.02           | 895         | 881             | 0.212                                            | 0.2     | 179          |
| 1                       | 0.200                                        | 0.025                                            | 0.225                                        | 0.03           | 895         | 881             | 0.212                                            | 0.2     | 179          |
| 1                       | 0.200                                        | 0.050                                            | 0.250                                        | 0.01           | 895         | 886             | 0.207                                            | 40.9    | 179          |
| 1                       | 0.200                                        | 0.050                                            | 0.250                                        | 0.02           | 895         | 877             | 0.215                                            | 3.3     | 179          |
| 1                       | 0.200                                        | 0.050                                            | 0.250                                        | 0.03           | 895         | 869             | 0.223                                            | 0.2     | 175          |
| 1                       | 0.200                                        | 0.100                                            | 0.300                                        | 0.01           | 895         | 886             | 0.207                                            | 85.1    | 179          |
| 1                       | 0.200                                        | 0.100                                            | 0.300                                        | 0.02           | 895         | 877             | 0.215                                            | 33.7    | 179          |
| 1                       | 0.200                                        | 0.100                                            | 0.300                                        | 0.03           | 895         | 868             | 0.223                                            | 9.9     | 175          |
| 1                       | 0.200                                        | 0.150                                            | 0.350                                        | 0.01           | 895         | 886             | 0.207                                            | 111.7   | 179          |
| 1                       | 0.200                                        | 0.150                                            | 0.350                                        | 0.02           | 895         | 877             | 0.215                                            | 55.6    | 179          |
| 1                       | 0.200                                        | 0.150                                            | 0.350                                        | 0.03           | 895         | 868             | 0.223                                            | 27.9    | 175          |
| 1                       | 0.200                                        | 0.200                                            | 0.400                                        | 0.01           | 895         | 886             | 0.207                                            | 130.2   | 179          |
| 1                       | 0.200                                        | 0.200                                            | 0.400                                        | 0.02           | 895         | 877             | 0.215                                            | 71.5    | 179          |
| 1                       | 0.200                                        | 0.200                                            | 0.400                                        | 0.03           | 895         | 868             | 0.223                                            | 41.7    | 175          |
| 1                       | 0.250                                        | 0.025                                            | 0.275                                        | 0.01           | 840         | 832             | 0.259                                            | 1.5     | 161          |
| 1                       | 0.250                                        | 0.025                                            | 0.275                                        | 0.02           | 840         | 829             | 0.262                                            | 0.2     | 161          |
| 1                       | 0.250                                        | 0.025                                            | 0.275                                        | 0.03           | 840         | 829             | 0.262                                            | 0.2     | 161          |
| 1                       | 0.250                                        | 0.050                                            | 0.300                                        | 0.01           | 840         | 832             | 0.259                                            | 25.5    | 161          |
| 1                       | 0.250                                        | 0.050                                            | 0.300                                        | 0.02           | 840         | 824             | 0.268                                            | 1.2     | 157          |
| 1                       | 0.250                                        | 0.050                                            | 0.300                                        | 0.03           | 840         | 819             | 0.273                                            | 0.2     | 157          |
| 1                       | 0.250                                        | 0.100                                            | 0.350                                        | 0.01           | 840         | 832             | 0.259                                            | 65.1    | 161          |
| 1                       | 0.250                                        | 0.100                                            | 0.350                                        | 0.02           | 840         | 824             | 0.268                                            | 20.6    | 157          |
| 1                       | 0.250                                        | 0.100                                            | 0.350                                        | 0.03           | 840         | 815             | 0.278                                            | 3.3     | 154          |
| 1                       | 0.250                                        | 0.150                                            | 0.400                                        | 0.01           | 840         | 832             | 0.259                                            | 90.4    | 161          |
| 1                       | 0.250                                        | 0.150                                            | 0.400                                        | 0.02           | 840         | 824             | 0.268                                            | 40.1    | 157          |
| 1                       | 0.250                                        | 0.150                                            | 0.400                                        | 0.03           | 840         | 815             | 0.278                                            | 16.5    | 154          |
| 1                       | 0.250                                        | 0.200                                            | 0.450                                        | 0.01           | 840         | 832             | 0.259                                            | 108.3   | 161          |
| 1                       | 0.250                                        | 0.200                                            | 0.450                                        | 0.02           | 840         | 824             | 0.268                                            | 54.8    | 157          |
| 1                       | 0.250                                        | 0.200                                            | 0.450                                        | 0.03           | 840         | 815             | 0.278                                            | 28.8    | 154          |
| 1                       | 0.300                                        | 0.025                                            | 0.325                                        | 0.01           | 797         | 789             | 0.310                                            | 0.7     | 146          |
| 1                       | 0.300                                        | 0.025                                            | 0.325                                        | 0.02           | 797         | 788             | 0.312                                            | 0.2     | 146          |
| 1                       | 0.300                                        | 0.025                                            | 0.325                                        | 0.03           | 797         | 788             | 0.312                                            | 0.2     | 146          |
| 1                       | 0.300                                        | 0.050                                            | 0.350                                        | 0.01           | 797         | 789             | 0.310                                            | 15.5    | 146          |
| 1                       | 0.300                                        | 0.050                                            | 0.350                                        | 0.02           | 797         | 781             | 0.320                                            | 0.6     | 143          |
| 1                       | 0.300                                        | 0.050                                            | 0.350                                        | 0.03           | 797         | 779             | 0.323                                            | 0.2     | 143          |
| 1                       | 0.300                                        | 0.100                                            | 0.400                                        | 0.01           | 797         | 789             | 0.310                                            | 50.4    | 146          |
| 1                       | 0.300                                        | 0.100                                            | 0.400                                        | 0.02           | 797         | 781             | 0.321                                            | 12.1    | 143          |
| 1                       | 0.300                                        | 0.100                                            | 0.400                                        | 0.03           | 797         | 773             | 0.331                                            | 1.7     | 141          |
| 1                       | 0.300                                        | 0.150                                            | 0.450                                        | 0.01           | 797         | 789             | 0.310                                            | 74.0    | 146          |
| 1                       | 0.300                                        | 0.150                                            | 0.450                                        | 0.02           | 797         | 781             | 0.321                                            | 29.3    | 143          |
| 1                       | 0.300                                        | 0.150                                            | 0.450                                        | 0.03           | 797         | 773             | 0.332                                            | 9.1     | 141          |
| 1                       | 0.300                                        | 0.200                                            | 0.500                                        | 0.01           | 797         | 789             | 0.310                                            | 91.0    | 146          |
| 1                       | 0.300                                        | 0.200                                            | 0.500                                        | 0.02           | 797         | 781             | 0.321                                            | 42.5    | 143          |
| 1                       | 0.300                                        | 0.200                                            | 0.500                                        | 0.03           | 797         | 773             | 0.332                                            | 19.8    | 141          |
| 1                       | 0.350                                        | 0.025                                            | 0.375                                        | 0.01           | 760         | 753             | 0.361                                            | 0.3     | 135          |
| 1                       | 0.350                                        | 0.025                                            | 0.375                                        | 0.02           | 760         | 753             | 0.362                                            | 0.2     | 135          |
| 1                       | 0.350                                        | 0.025                                            | 0.375                                        | 0.03           | 760         | 753             | 0.362                                            | 0.2     | 135          |
| 1                       | 0.350                                        | 0.050                                            | 0.400                                        | 0.01           | 760         | 753             | 0.362                                            | 9.0     | 135          |
| 1                       | 0.350                                        | 0.050                                            | 0.400                                        | 0.02           | 760         | 745             | 0.373                                            | 0.2     | 134          |
| 1                       | 0.350                                        | 0.050                                            | 0.400                                        | 0.03           | 760         | 745             | 0.373                                            | 0.2     | 134          |
| 1                       | 0.350                                        | 0.100                                            | 0.450                                        | 0.01           | 760         | 753             | 0.362                                            | 40.2    | 135          |
| 1                       | 0.350                                        | 0.100                                            | 0.450                                        | 0.02           | 760         | 745             | 0.373                                            | 6.6     | 134          |
| 1                       | 0.350                                        | 0.100                                            | 0.450                                        | 0.03           | 760         | 738             | 0.385                                            | 1.0     | 131          |
| 1                       | 0.350                                        | 0.150                                            | 0.500                                        | 0.01           | 760         | 753             | 0.362                                            | 61.7    | 135          |
| 1                       | 0.350                                        | 0.150                                            | 0.500                                        | 0.02           | 760         | 745             | 0.373                                            | 21.8    | 134          |

| $h$ (g/m <sup>3</sup> ) | $\theta_1$ (m <sup>3</sup> /m <sup>3</sup> ) | $\Delta\theta$ (m <sup>3</sup> /m <sup>3</sup> ) | $\theta_2$ (m <sup>3</sup> /m <sup>3</sup> ) | $\sigma_N$ (-) | $N_1$ (cph) | $\hat{N}$ (cph) | $\hat{\theta}$ (m <sup>3</sup> /m <sup>3</sup> ) | $R$ (m) | $R_{86}$ (m) |
|-------------------------|----------------------------------------------|--------------------------------------------------|----------------------------------------------|----------------|-------------|-----------------|--------------------------------------------------|---------|--------------|
| 1                       | 0.350                                        | 0.150                                            | 0.500                                        | 0.03           | 760         | 738             | 0.386                                            | 4.8     | 131          |
| 1                       | 0.350                                        | 0.200                                            | 0.550                                        | 0.01           | 760         | 753             | 0.362                                            | 77.8    | 135          |
| 1                       | 0.350                                        | 0.200                                            | 0.550                                        | 0.02           | 760         | 745             | 0.373                                            | 33.8    | 134          |
| 1                       | 0.350                                        | 0.200                                            | 0.550                                        | 0.03           | 760         | 738             | 0.386                                            | 13.6    | 131          |
| 1                       | 0.400                                        | 0.025                                            | 0.425                                        | 0.01           | 729         | 722             | 0.412                                            | 0.2     | 129          |
| 1                       | 0.400                                        | 0.025                                            | 0.425                                        | 0.02           | 729         | 722             | 0.412                                            | 0.2     | 129          |
| 1                       | 0.400                                        | 0.025                                            | 0.425                                        | 0.03           | 729         | 722             | 0.412                                            | 0.2     | 129          |
| 1                       | 0.400                                        | 0.050                                            | 0.450                                        | 0.01           | 729         | 722             | 0.413                                            | 5.1     | 129          |
| 1                       | 0.400                                        | 0.050                                            | 0.450                                        | 0.02           | 729         | 716             | 0.423                                            | 0.2     | 128          |
| 1                       | 0.400                                        | 0.050                                            | 0.450                                        | 0.03           | 729         | 716             | 0.423                                            | 0.2     | 128          |
| 1                       | 0.400                                        | 0.100                                            | 0.500                                        | 0.01           | 729         | 722             | 0.413                                            | 33.0    | 129          |
| 1                       | 0.400                                        | 0.100                                            | 0.500                                        | 0.02           | 729         | 715             | 0.426                                            | 3.8     | 127          |
| 1                       | 0.400                                        | 0.100                                            | 0.500                                        | 0.03           | 729         | 707             | 0.439                                            | 0.6     | 127          |
| 1                       | 0.400                                        | 0.150                                            | 0.550                                        | 0.01           | 729         | 722             | 0.413                                            | 52.8    | 129          |
| 1                       | 0.400                                        | 0.150                                            | 0.550                                        | 0.02           | 729         | 715             | 0.426                                            | 16.3    | 127          |
| 1                       | 0.400                                        | 0.150                                            | 0.550                                        | 0.03           | 729         | 707             | 0.439                                            | 2.9     | 127          |
| 1                       | 0.400                                        | 0.200                                            | 0.600                                        | 0.01           | 729         | 722             | 0.413                                            | 68.1    | 129          |
| 1                       | 0.400                                        | 0.200                                            | 0.600                                        | 0.02           | 729         | 714             | 0.426                                            | 27.5    | 127          |
| 1                       | 0.400                                        | 0.200                                            | 0.600                                        | 0.03           | 729         | 707             | 0.439                                            | 9.1     | 127          |
| 1                       | 0.450                                        | 0.025                                            | 0.475                                        | 0.01           | 702         | 696             | 0.462                                            | 0.2     | 126          |
| 1                       | 0.450                                        | 0.025                                            | 0.475                                        | 0.02           | 702         | 696             | 0.462                                            | 0.2     | 126          |
| 1                       | 0.450                                        | 0.025                                            | 0.475                                        | 0.03           | 702         | 696             | 0.462                                            | 0.2     | 126          |
| 1                       | 0.450                                        | 0.050                                            | 0.500                                        | 0.01           | 702         | 695             | 0.464                                            | 3.2     | 126          |
| 1                       | 0.450                                        | 0.050                                            | 0.500                                        | 0.02           | 702         | 690             | 0.473                                            | 0.2     | 126          |
| 1                       | 0.450                                        | 0.050                                            | 0.500                                        | 0.03           | 702         | 690             | 0.473                                            | 0.2     | 126          |
| 1                       | 0.450                                        | 0.100                                            | 0.550                                        | 0.01           | 702         | 695             | 0.464                                            | 27.8    | 126          |
| 1                       | 0.450                                        | 0.100                                            | 0.550                                        | 0.02           | 702         | 688             | 0.478                                            | 2.5     | 126          |
| 1                       | 0.450                                        | 0.100                                            | 0.550                                        | 0.03           | 702         | 681             | 0.492                                            | 0.4     | 126          |
| 1                       | 0.450                                        | 0.150                                            | 0.600                                        | 0.01           | 702         | 695             | 0.464                                            | 46.5    | 126          |
| 1                       | 0.450                                        | 0.150                                            | 0.600                                        | 0.02           | 702         | 688             | 0.478                                            | 12.2    | 126          |
| 1                       | 0.450                                        | 0.150                                            | 0.600                                        | 0.03           | 702         | 681             | 0.493                                            | 2.0     | 126          |
| 1                       | 0.450                                        | 0.200                                            | 0.650                                        | 0.01           | 702         | 695             | 0.464                                            | 61.2    | 126          |
| 1                       | 0.450                                        | 0.200                                            | 0.650                                        | 0.02           | 702         | 688             | 0.478                                            | 22.9    | 126          |
| 1                       | 0.450                                        | 0.200                                            | 0.650                                        | 0.03           | 702         | 681             | 0.493                                            | 6.0     | 126          |
| 1                       | 0.500                                        | 0.025                                            | 0.525                                        | 0.01           | 678         | 672             | 0.512                                            | 0.2     | 126          |
| 1                       | 0.500                                        | 0.025                                            | 0.525                                        | 0.02           | 678         | 672             | 0.512                                            | 0.2     | 126          |
| 1                       | 0.500                                        | 0.025                                            | 0.525                                        | 0.03           | 678         | 672             | 0.512                                            | 0.2     | 126          |
| 1                       | 0.500                                        | 0.050                                            | 0.550                                        | 0.01           | 678         | 671             | 0.515                                            | 2.3     | 126          |
| 1                       | 0.500                                        | 0.050                                            | 0.550                                        | 0.02           | 678         | 667             | 0.523                                            | 0.2     | 126          |
| 1                       | 0.500                                        | 0.050                                            | 0.550                                        | 0.03           | 678         | 667             | 0.523                                            | 0.2     | 126          |
| 1                       | 0.500                                        | 0.100                                            | 0.600                                        | 0.01           | 678         | 671             | 0.515                                            | 23.9    | 126          |
| 1                       | 0.500                                        | 0.100                                            | 0.600                                        | 0.02           | 678         | 664             | 0.531                                            | 1.8     | 126          |
| 1                       | 0.500                                        | 0.100                                            | 0.600                                        | 0.03           | 678         | 658             | 0.546                                            | 0.2     | 126          |
| 1                       | 0.500                                        | 0.150                                            | 0.650                                        | 0.01           | 678         | 671             | 0.515                                            | 42.2    | 126          |
| 1                       | 0.500                                        | 0.150                                            | 0.650                                        | 0.02           | 678         | 664             | 0.531                                            | 9.0     | 126          |
| 1                       | 0.500                                        | 0.150                                            | 0.650                                        | 0.03           | 678         | 657             | 0.547                                            | 1.5     | 126          |
| 1                       | 0.500                                        | 0.200                                            | 0.700                                        | 0.01           | 678         | 671             | 0.515                                            | 56.4    | 126          |
| 1                       | 0.500                                        | 0.200                                            | 0.700                                        | 0.02           | 678         | 664             | 0.531                                            | 19.3    | 126          |
| 1                       | 0.500                                        | 0.200                                            | 0.700                                        | 0.03           | 678         | 657             | 0.547                                            | 4.1     | 126          |
| 5                       | 0.010                                        | 0.025                                            | 0.035                                        | 0.01           | 1866        | 1848            | 0.011                                            | 187.5   | 214          |
| 5                       | 0.010                                        | 0.025                                            | 0.035                                        | 0.02           | 1866        | 1829            | 0.011                                            | 125.6   | 214          |
| 5                       | 0.010                                        | 0.025                                            | 0.035                                        | 0.03           | 1866        | 1810            | 0.012                                            | 90.2    | 214          |
| 5                       | 0.010                                        | 0.050                                            | 0.060                                        | 0.01           | 1866        | 1848            | 0.011                                            | 218.3   | 214          |
| 5                       | 0.010                                        | 0.050                                            | 0.060                                        | 0.02           | 1866        | 1829            | 0.011                                            | 156.5   | 214          |
| 5                       | 0.010                                        | 0.050                                            | 0.060                                        | 0.03           | 1866        | 1810            | 0.012                                            | 120.4   | 214          |
| 5                       | 0.010                                        | 0.100                                            | 0.110                                        | 0.01           | 1866        | 1848            | 0.011                                            | 239.8   | 214          |
| 5                       | 0.010                                        | 0.100                                            | 0.110                                        | 0.02           | 1866        | 1829            | 0.011                                            | 178.6   | 214          |
| 5                       | 0.010                                        | 0.100                                            | 0.110                                        | 0.03           | 1866        | 1810            | 0.012                                            | 142.3   | 214          |

| $h$ (g/m <sup>3</sup> ) | $\theta_1$ (m <sup>3</sup> /m <sup>3</sup> ) | $\Delta\theta$ (m <sup>3</sup> /m <sup>3</sup> ) | $\theta_2$ (m <sup>3</sup> /m <sup>3</sup> ) | $\sigma_N$ (-) | $N_1$ (cph) | $\hat{N}$ (cph) | $\hat{\theta}$ (m <sup>3</sup> /m <sup>3</sup> ) | $R$ (m) | $R_{86}$ (m) |
|-------------------------|----------------------------------------------|--------------------------------------------------|----------------------------------------------|----------------|-------------|-----------------|--------------------------------------------------|---------|--------------|
| 5                       | 0.010                                        | 0.150                                            | 0.160                                        | 0.01           | 1866        | 1848            | 0.011                                            | 249.2   | 214          |
| 5                       | 0.010                                        | 0.150                                            | 0.160                                        | 0.02           | 1866        | 1829            | 0.011                                            | 188.4   | 214          |
| 5                       | 0.010                                        | 0.150                                            | 0.160                                        | 0.03           | 1866        | 1810            | 0.012                                            | 152.0   | 214          |
| 5                       | 0.010                                        | 0.200                                            | 0.210                                        | 0.01           | 1866        | 1848            | 0.011                                            | 255.0   | 214          |
| 5                       | 0.010                                        | 0.200                                            | 0.210                                        | 0.02           | 1866        | 1829            | 0.011                                            | 194.3   | 214          |
| 5                       | 0.010                                        | 0.200                                            | 0.210                                        | 0.03           | 1866        | 1810            | 0.012                                            | 158.0   | 214          |
| 5                       | 0.050                                        | 0.025                                            | 0.075                                        | 0.01           | 1262        | 1249            | 0.052                                            | 102.9   | 218          |
| 5                       | 0.050                                        | 0.025                                            | 0.075                                        | 0.02           | 1262        | 1237            | 0.054                                            | 45.6    | 218          |
| 5                       | 0.050                                        | 0.025                                            | 0.075                                        | 0.03           | 1262        | 1224            | 0.056                                            | 16.8    | 218          |
| 5                       | 0.050                                        | 0.050                                            | 0.100                                        | 0.01           | 1262        | 1249            | 0.052                                            | 147.7   | 218          |
| 5                       | 0.050                                        | 0.050                                            | 0.100                                        | 0.02           | 1262        | 1237            | 0.054                                            | 85.4    | 218          |
| 5                       | 0.050                                        | 0.050                                            | 0.100                                        | 0.03           | 1262        | 1224            | 0.056                                            | 52.2    | 218          |
| 5                       | 0.050                                        | 0.100                                            | 0.150                                        | 0.01           | 1262        | 1249            | 0.052                                            | 185.2   | 218          |
| 5                       | 0.050                                        | 0.100                                            | 0.150                                        | 0.02           | 1262        | 1237            | 0.054                                            | 120.6   | 218          |
| 5                       | 0.050                                        | 0.100                                            | 0.150                                        | 0.03           | 1262        | 1224            | 0.056                                            | 84.8    | 218          |
| 5                       | 0.050                                        | 0.150                                            | 0.200                                        | 0.01           | 1262        | 1249            | 0.052                                            | 203.5   | 218          |
| 5                       | 0.050                                        | 0.150                                            | 0.200                                        | 0.02           | 1262        | 1237            | 0.054                                            | 138.3   | 218          |
| 5                       | 0.050                                        | 0.150                                            | 0.200                                        | 0.03           | 1262        | 1224            | 0.056                                            | 101.6   | 218          |
| 5                       | 0.050                                        | 0.200                                            | 0.250                                        | 0.01           | 1262        | 1249            | 0.052                                            | 214.9   | 218          |
| 5                       | 0.050                                        | 0.200                                            | 0.250                                        | 0.02           | 1262        | 1237            | 0.054                                            | 149.7   | 218          |
| 5                       | 0.050                                        | 0.200                                            | 0.250                                        | 0.03           | 1262        | 1224            | 0.056                                            | 112.5   | 218          |
| 5                       | 0.100                                        | 0.025                                            | 0.125                                        | 0.01           | 1039        | 1029            | 0.104                                            | 49.4    | 209          |
| 5                       | 0.100                                        | 0.025                                            | 0.125                                        | 0.02           | 1039        | 1018            | 0.108                                            | 4.4     | 206          |
| 5                       | 0.100                                        | 0.025                                            | 0.125                                        | 0.03           | 1039        | 1009            | 0.111                                            | 0.2     | 206          |
| 5                       | 0.100                                        | 0.050                                            | 0.150                                        | 0.01           | 1039        | 1029            | 0.104                                            | 96.1    | 209          |
| 5                       | 0.100                                        | 0.050                                            | 0.150                                        | 0.02           | 1039        | 1018            | 0.108                                            | 40.2    | 206          |
| 5                       | 0.100                                        | 0.050                                            | 0.150                                        | 0.03           | 1039        | 1008            | 0.112                                            | 12.6    | 206          |
| 5                       | 0.100                                        | 0.100                                            | 0.200                                        | 0.01           | 1039        | 1029            | 0.104                                            | 141.3   | 209          |
| 5                       | 0.100                                        | 0.100                                            | 0.200                                        | 0.02           | 1039        | 1018            | 0.108                                            | 79.5    | 206          |
| 5                       | 0.100                                        | 0.100                                            | 0.200                                        | 0.03           | 1039        | 1008            | 0.112                                            | 47.2    | 206          |
| 5                       | 0.100                                        | 0.150                                            | 0.250                                        | 0.01           | 1039        | 1029            | 0.104                                            | 165.3   | 209          |
| 5                       | 0.100                                        | 0.150                                            | 0.250                                        | 0.02           | 1039        | 1018            | 0.108                                            | 101.5   | 206          |
| 5                       | 0.100                                        | 0.150                                            | 0.250                                        | 0.03           | 1039        | 1008            | 0.112                                            | 67.1    | 206          |
| 5                       | 0.100                                        | 0.200                                            | 0.300                                        | 0.01           | 1039        | 1029            | 0.104                                            | 181.0   | 209          |
| 5                       | 0.100                                        | 0.200                                            | 0.300                                        | 0.02           | 1039        | 1018            | 0.108                                            | 116.2   | 206          |
| 5                       | 0.100                                        | 0.200                                            | 0.300                                        | 0.03           | 1039        | 1008            | 0.112                                            | 80.8    | 206          |
| 5                       | 0.150                                        | 0.025                                            | 0.175                                        | 0.01           | 930         | 920             | 0.156                                            | 19.3    | 189          |
| 5                       | 0.150                                        | 0.025                                            | 0.175                                        | 0.02           | 930         | 911             | 0.161                                            | 0.3     | 189          |
| 5                       | 0.150                                        | 0.025                                            | 0.175                                        | 0.03           | 930         | 911             | 0.162                                            | 0.2     | 189          |
| 5                       | 0.150                                        | 0.050                                            | 0.200                                        | 0.01           | 930         | 920             | 0.156                                            | 61.8    | 189          |
| 5                       | 0.150                                        | 0.050                                            | 0.200                                        | 0.02           | 930         | 911             | 0.161                                            | 14.4    | 189          |
| 5                       | 0.150                                        | 0.050                                            | 0.200                                        | 0.03           | 930         | 902             | 0.168                                            | 1.3     | 185          |
| 5                       | 0.150                                        | 0.100                                            | 0.250                                        | 0.01           | 930         | 920             | 0.156                                            | 107.2   | 189          |
| 5                       | 0.150                                        | 0.100                                            | 0.250                                        | 0.02           | 930         | 911             | 0.161                                            | 51.4    | 189          |
| 5                       | 0.150                                        | 0.100                                            | 0.250                                        | 0.03           | 930         | 902             | 0.168                                            | 23.4    | 185          |
| 5                       | 0.150                                        | 0.150                                            | 0.300                                        | 0.01           | 930         | 920             | 0.156                                            | 133.2   | 189          |
| 5                       | 0.150                                        | 0.150                                            | 0.300                                        | 0.02           | 930         | 911             | 0.161                                            | 73.8    | 189          |
| 5                       | 0.150                                        | 0.150                                            | 0.300                                        | 0.03           | 930         | 902             | 0.168                                            | 43.2    | 185          |
| 5                       | 0.150                                        | 0.200                                            | 0.350                                        | 0.01           | 930         | 920             | 0.156                                            | 150.7   | 189          |
| 5                       | 0.150                                        | 0.200                                            | 0.350                                        | 0.02           | 930         | 911             | 0.161                                            | 89.4    | 189          |
| 5                       | 0.150                                        | 0.200                                            | 0.350                                        | 0.03           | 930         | 902             | 0.168                                            | 57.2    | 185          |
| 5                       | 0.200                                        | 0.025                                            | 0.225                                        | 0.01           | 859         | 850             | 0.207                                            | 4.5     | 170          |
| 5                       | 0.200                                        | 0.025                                            | 0.225                                        | 0.02           | 859         | 845             | 0.212                                            | 0.2     | 170          |
| 5                       | 0.200                                        | 0.025                                            | 0.225                                        | 0.03           | 859         | 845             | 0.212                                            | 0.2     | 170          |
| 5                       | 0.200                                        | 0.050                                            | 0.250                                        | 0.01           | 859         | 850             | 0.207                                            | 39.1    | 170          |
| 5                       | 0.200                                        | 0.050                                            | 0.250                                        | 0.02           | 859         | 842             | 0.215                                            | 3.1     | 170          |
| 5                       | 0.200                                        | 0.050                                            | 0.250                                        | 0.03           | 859         | 833             | 0.223                                            | 0.2     | 166          |
| 5                       | 0.200                                        | 0.100                                            | 0.300                                        | 0.01           | 859         | 850             | 0.207                                            | 81.5    | 170          |

| $h$ (g/m <sup>3</sup> ) | $\theta_1$ (m <sup>3</sup> /m <sup>3</sup> ) | $\Delta\theta$ (m <sup>3</sup> /m <sup>3</sup> ) | $\theta_2$ (m <sup>3</sup> /m <sup>3</sup> ) | $\sigma_N$ (-) | $N_1$ (cph) | $\hat{N}$ (cph) | $\hat{\theta}$ (m <sup>3</sup> /m <sup>3</sup> ) | $R$ (m) | $R_{86}$ (m) |
|-------------------------|----------------------------------------------|--------------------------------------------------|----------------------------------------------|----------------|-------------|-----------------|--------------------------------------------------|---------|--------------|
| 5                       | 0.200                                        | 0.100                                            | 0.300                                        | 0.02           | 859         | 842             | 0.215                                            | 32.2    | 170          |
| 5                       | 0.200                                        | 0.100                                            | 0.300                                        | 0.03           | 859         | 833             | 0.223                                            | 9.3     | 166          |
| 5                       | 0.200                                        | 0.150                                            | 0.350                                        | 0.01           | 859         | 850             | 0.207                                            | 107.1   | 170          |
| 5                       | 0.200                                        | 0.150                                            | 0.350                                        | 0.02           | 859         | 842             | 0.215                                            | 53.2    | 170          |
| 5                       | 0.200                                        | 0.150                                            | 0.350                                        | 0.03           | 859         | 833             | 0.223                                            | 26.6    | 166          |
| 5                       | 0.200                                        | 0.200                                            | 0.400                                        | 0.01           | 859         | 850             | 0.207                                            | 124.9   | 170          |
| 5                       | 0.200                                        | 0.200                                            | 0.400                                        | 0.02           | 859         | 842             | 0.215                                            | 68.4    | 170          |
| 5                       | 0.200                                        | 0.200                                            | 0.400                                        | 0.03           | 859         | 833             | 0.223                                            | 39.8    | 166          |
| 5                       | 0.250                                        | 0.025                                            | 0.275                                        | 0.01           | 806         | 798             | 0.259                                            | 1.5     | 153          |
| 5                       | 0.250                                        | 0.025                                            | 0.275                                        | 0.02           | 806         | 796             | 0.262                                            | 0.2     | 153          |
| 5                       | 0.250                                        | 0.025                                            | 0.275                                        | 0.03           | 806         | 796             | 0.262                                            | 0.2     | 153          |
| 5                       | 0.250                                        | 0.050                                            | 0.300                                        | 0.01           | 806         | 798             | 0.259                                            | 24.3    | 153          |
| 5                       | 0.250                                        | 0.050                                            | 0.300                                        | 0.02           | 806         | 791             | 0.268                                            | 1.2     | 150          |
| 5                       | 0.250                                        | 0.050                                            | 0.300                                        | 0.03           | 806         | 786             | 0.273                                            | 0.2     | 150          |
| 5                       | 0.250                                        | 0.100                                            | 0.350                                        | 0.01           | 806         | 798             | 0.259                                            | 62.3    | 153          |
| 5                       | 0.250                                        | 0.100                                            | 0.350                                        | 0.02           | 806         | 790             | 0.268                                            | 19.6    | 150          |
| 5                       | 0.250                                        | 0.100                                            | 0.350                                        | 0.03           | 806         | 782             | 0.278                                            | 3.1     | 147          |
| 5                       | 0.250                                        | 0.150                                            | 0.400                                        | 0.01           | 806         | 798             | 0.259                                            | 86.5    | 153          |
| 5                       | 0.250                                        | 0.150                                            | 0.400                                        | 0.02           | 806         | 790             | 0.268                                            | 38.4    | 150          |
| 5                       | 0.250                                        | 0.150                                            | 0.400                                        | 0.03           | 806         | 782             | 0.278                                            | 15.7    | 147          |
| 5                       | 0.250                                        | 0.200                                            | 0.450                                        | 0.01           | 806         | 798             | 0.259                                            | 103.7   | 153          |
| 5                       | 0.250                                        | 0.200                                            | 0.450                                        | 0.02           | 806         | 790             | 0.268                                            | 52.3    | 150          |
| 5                       | 0.250                                        | 0.200                                            | 0.450                                        | 0.03           | 806         | 782             | 0.278                                            | 27.4    | 147          |
| 5                       | 0.300                                        | 0.025                                            | 0.325                                        | 0.01           | 765         | 757             | 0.310                                            | 0.7     | 139          |
| 5                       | 0.300                                        | 0.025                                            | 0.325                                        | 0.02           | 765         | 756             | 0.312                                            | 0.2     | 139          |
| 5                       | 0.300                                        | 0.025                                            | 0.325                                        | 0.03           | 765         | 756             | 0.312                                            | 0.2     | 139          |
| 5                       | 0.300                                        | 0.050                                            | 0.350                                        | 0.01           | 765         | 757             | 0.310                                            | 14.7    | 139          |
| 5                       | 0.300                                        | 0.050                                            | 0.350                                        | 0.02           | 765         | 750             | 0.320                                            | 0.6     | 137          |
| 5                       | 0.300                                        | 0.050                                            | 0.350                                        | 0.03           | 765         | 748             | 0.323                                            | 0.2     | 137          |
| 5                       | 0.300                                        | 0.100                                            | 0.400                                        | 0.01           | 765         | 757             | 0.310                                            | 48.2    | 139          |
| 5                       | 0.300                                        | 0.100                                            | 0.400                                        | 0.02           | 765         | 749             | 0.321                                            | 11.4    | 137          |
| 5                       | 0.300                                        | 0.100                                            | 0.400                                        | 0.03           | 765         | 742             | 0.332                                            | 1.6     | 134          |
| 5                       | 0.300                                        | 0.150                                            | 0.450                                        | 0.01           | 765         | 757             | 0.310                                            | 70.7    | 139          |
| 5                       | 0.300                                        | 0.150                                            | 0.450                                        | 0.02           | 765         | 749             | 0.321                                            | 28.0    | 137          |
| 5                       | 0.300                                        | 0.150                                            | 0.450                                        | 0.03           | 765         | 742             | 0.332                                            | 8.6     | 134          |
| 5                       | 0.300                                        | 0.200                                            | 0.500                                        | 0.01           | 765         | 757             | 0.310                                            | 87.0    | 139          |
| 5                       | 0.300                                        | 0.200                                            | 0.500                                        | 0.02           | 765         | 749             | 0.321                                            | 40.6    | 137          |
| 5                       | 0.300                                        | 0.200                                            | 0.500                                        | 0.03           | 765         | 742             | 0.332                                            | 18.8    | 134          |
| 5                       | 0.350                                        | 0.025                                            | 0.375                                        | 0.01           | 730         | 723             | 0.361                                            | 0.3     | 129          |
| 5                       | 0.350                                        | 0.025                                            | 0.375                                        | 0.02           | 730         | 722             | 0.362                                            | 0.2     | 129          |
| 5                       | 0.350                                        | 0.025                                            | 0.375                                        | 0.03           | 730         | 722             | 0.362                                            | 0.2     | 129          |
| 5                       | 0.350                                        | 0.050                                            | 0.400                                        | 0.01           | 730         | 723             | 0.362                                            | 8.5     | 129          |
| 5                       | 0.350                                        | 0.050                                            | 0.400                                        | 0.02           | 730         | 716             | 0.373                                            | 0.2     | 127          |
| 5                       | 0.350                                        | 0.050                                            | 0.400                                        | 0.03           | 730         | 716             | 0.373                                            | 0.2     | 127          |
| 5                       | 0.350                                        | 0.100                                            | 0.450                                        | 0.01           | 730         | 723             | 0.362                                            | 38.4    | 129          |
| 5                       | 0.350                                        | 0.100                                            | 0.450                                        | 0.02           | 730         | 715             | 0.374                                            | 6.2     | 127          |
| 5                       | 0.350                                        | 0.100                                            | 0.450                                        | 0.03           | 730         | 708             | 0.385                                            | 1.0     | 125          |
| 5                       | 0.350                                        | 0.150                                            | 0.500                                        | 0.01           | 730         | 723             | 0.362                                            | 58.9    | 129          |
| 5                       | 0.350                                        | 0.150                                            | 0.500                                        | 0.02           | 730         | 715             | 0.374                                            | 20.7    | 127          |
| 5                       | 0.350                                        | 0.150                                            | 0.500                                        | 0.03           | 730         | 708             | 0.386                                            | 4.5     | 125          |
| 5                       | 0.350                                        | 0.200                                            | 0.550                                        | 0.01           | 730         | 723             | 0.362                                            | 74.3    | 129          |
| 5                       | 0.350                                        | 0.200                                            | 0.550                                        | 0.02           | 730         | 715             | 0.374                                            | 32.3    | 127          |
| 5                       | 0.350                                        | 0.200                                            | 0.550                                        | 0.03           | 730         | 708             | 0.386                                            | 12.8    | 125          |
| 5                       | 0.400                                        | 0.025                                            | 0.425                                        | 0.01           | 700         | 694             | 0.412                                            | 0.2     | 123          |
| 5                       | 0.400                                        | 0.025                                            | 0.425                                        | 0.02           | 700         | 694             | 0.412                                            | 0.2     | 123          |
| 5                       | 0.400                                        | 0.025                                            | 0.425                                        | 0.03           | 700         | 694             | 0.412                                            | 0.2     | 123          |
| 5                       | 0.400                                        | 0.050                                            | 0.450                                        | 0.01           | 700         | 693             | 0.413                                            | 4.8     | 123          |
| 5                       | 0.400                                        | 0.050                                            | 0.450                                        | 0.02           | 700         | 688             | 0.423                                            | 0.2     | 122          |

| $h$ (g/m <sup>3</sup> ) | $\theta_1$ (m <sup>3</sup> /m <sup>3</sup> ) | $\Delta\theta$ (m <sup>3</sup> /m <sup>3</sup> ) | $\theta_2$ (m <sup>3</sup> /m <sup>3</sup> ) | $\sigma_N$ (-) | $N_1$ (cph) | $\hat{N}$ (cph) | $\hat{\theta}$ (m <sup>3</sup> /m <sup>3</sup> ) | $R$ (m) | $R_{86}$ (m) |
|-------------------------|----------------------------------------------|--------------------------------------------------|----------------------------------------------|----------------|-------------|-----------------|--------------------------------------------------|---------|--------------|
| 5                       | 0.400                                        | 0.050                                            | 0.450                                        | 0.03           | 700         | 688             | 0.423                                            | 0.2     | 122          |
| 5                       | 0.400                                        | 0.100                                            | 0.500                                        | 0.01           | 700         | 693             | 0.413                                            | 31.5    | 123          |
| 5                       | 0.400                                        | 0.100                                            | 0.500                                        | 0.02           | 700         | 686             | 0.426                                            | 3.6     | 121          |
| 5                       | 0.400                                        | 0.100                                            | 0.500                                        | 0.03           | 700         | 679             | 0.439                                            | 0.6     | 121          |
| 5                       | 0.400                                        | 0.150                                            | 0.550                                        | 0.01           | 700         | 693             | 0.413                                            | 50.3    | 123          |
| 5                       | 0.400                                        | 0.150                                            | 0.550                                        | 0.02           | 700         | 686             | 0.426                                            | 15.4    | 121          |
| 5                       | 0.400                                        | 0.150                                            | 0.550                                        | 0.03           | 700         | 679             | 0.440                                            | 2.8     | 121          |
| 5                       | 0.400                                        | 0.200                                            | 0.600                                        | 0.01           | 700         | 693             | 0.413                                            | 64.9    | 123          |
| 5                       | 0.400                                        | 0.200                                            | 0.600                                        | 0.02           | 700         | 686             | 0.426                                            | 26.3    | 121          |
| 5                       | 0.400                                        | 0.200                                            | 0.600                                        | 0.03           | 700         | 679             | 0.440                                            | 8.5     | 121          |
| 5                       | 0.450                                        | 0.025                                            | 0.475                                        | 0.01           | 674         | 668             | 0.462                                            | 0.2     | 120          |
| 5                       | 0.450                                        | 0.025                                            | 0.475                                        | 0.02           | 674         | 668             | 0.462                                            | 0.2     | 120          |
| 5                       | 0.450                                        | 0.025                                            | 0.475                                        | 0.03           | 674         | 668             | 0.462                                            | 0.2     | 120          |
| 5                       | 0.450                                        | 0.050                                            | 0.500                                        | 0.01           | 674         | 667             | 0.464                                            | 3.0     | 120          |
| 5                       | 0.450                                        | 0.050                                            | 0.500                                        | 0.02           | 674         | 663             | 0.473                                            | 0.2     | 120          |
| 5                       | 0.450                                        | 0.050                                            | 0.500                                        | 0.03           | 674         | 663             | 0.473                                            | 0.2     | 120          |
| 5                       | 0.450                                        | 0.100                                            | 0.550                                        | 0.01           | 674         | 667             | 0.464                                            | 26.5    | 120          |
| 5                       | 0.450                                        | 0.100                                            | 0.550                                        | 0.02           | 674         | 661             | 0.478                                            | 2.4     | 120          |
| 5                       | 0.450                                        | 0.100                                            | 0.550                                        | 0.03           | 674         | 654             | 0.492                                            | 0.4     | 120          |
| 5                       | 0.450                                        | 0.150                                            | 0.600                                        | 0.01           | 674         | 667             | 0.464                                            | 44.3    | 120          |
| 5                       | 0.450                                        | 0.150                                            | 0.600                                        | 0.02           | 674         | 661             | 0.478                                            | 11.5    | 120          |
| 5                       | 0.450                                        | 0.150                                            | 0.600                                        | 0.03           | 674         | 654             | 0.493                                            | 2.0     | 120          |
| 5                       | 0.450                                        | 0.200                                            | 0.650                                        | 0.01           | 674         | 667             | 0.464                                            | 58.2    | 120          |
| 5                       | 0.450                                        | 0.200                                            | 0.650                                        | 0.02           | 674         | 661             | 0.478                                            | 21.8    | 120          |
| 5                       | 0.450                                        | 0.200                                            | 0.650                                        | 0.03           | 674         | 654             | 0.493                                            | 5.6     | 120          |
| 5                       | 0.500                                        | 0.025                                            | 0.525                                        | 0.01           | 651         | 646             | 0.512                                            | 0.2     | 120          |
| 5                       | 0.500                                        | 0.025                                            | 0.525                                        | 0.02           | 651         | 646             | 0.512                                            | 0.2     | 120          |
| 5                       | 0.500                                        | 0.025                                            | 0.525                                        | 0.03           | 651         | 646             | 0.512                                            | 0.2     | 120          |
| 5                       | 0.500                                        | 0.050                                            | 0.550                                        | 0.01           | 651         | 645             | 0.515                                            | 2.2     | 120          |
| 5                       | 0.500                                        | 0.050                                            | 0.550                                        | 0.02           | 651         | 641             | 0.523                                            | 0.2     | 120          |
| 5                       | 0.500                                        | 0.050                                            | 0.550                                        | 0.03           | 651         | 641             | 0.523                                            | 0.2     | 120          |
| 5                       | 0.500                                        | 0.100                                            | 0.600                                        | 0.01           | 651         | 644             | 0.515                                            | 22.6    | 120          |
| 5                       | 0.500                                        | 0.100                                            | 0.600                                        | 0.02           | 651         | 638             | 0.531                                            | 1.8     | 120          |
| 5                       | 0.500                                        | 0.100                                            | 0.600                                        | 0.03           | 651         | 632             | 0.546                                            | 0.2     | 120          |
| 5                       | 0.500                                        | 0.150                                            | 0.650                                        | 0.01           | 651         | 644             | 0.515                                            | 40.1    | 120          |
| 5                       | 0.500                                        | 0.150                                            | 0.650                                        | 0.02           | 651         | 638             | 0.531                                            | 8.4     | 120          |
| 5                       | 0.500                                        | 0.150                                            | 0.650                                        | 0.03           | 651         | 632             | 0.547                                            | 1.5     | 120          |
| 5                       | 0.500                                        | 0.200                                            | 0.700                                        | 0.01           | 651         | 644             | 0.515                                            | 53.5    | 120          |
| 5                       | 0.500                                        | 0.200                                            | 0.700                                        | 0.02           | 651         | 638             | 0.531                                            | 18.3    | 120          |
| 5                       | 0.500                                        | 0.200                                            | 0.700                                        | 0.03           | 651         | 632             | 0.547                                            | 3.9     | 120          |
| 10                      | 0.010                                        | 0.025                                            | 0.035                                        | 0.01           | 1778        | 1760            | 0.011                                            | 180.1   | 203          |
| 10                      | 0.010                                        | 0.025                                            | 0.035                                        | 0.02           | 1778        | 1743            | 0.011                                            | 120.4   | 203          |
| 10                      | 0.010                                        | 0.025                                            | 0.035                                        | 0.03           | 1778        | 1725            | 0.012                                            | 86.6    | 203          |
| 10                      | 0.010                                        | 0.050                                            | 0.060                                        | 0.01           | 1778        | 1760            | 0.011                                            | 210.0   | 203          |
| 10                      | 0.010                                        | 0.050                                            | 0.060                                        | 0.02           | 1778        | 1743            | 0.011                                            | 150.1   | 203          |
| 10                      | 0.010                                        | 0.050                                            | 0.060                                        | 0.03           | 1778        | 1725            | 0.012                                            | 115.4   | 203          |
| 10                      | 0.010                                        | 0.100                                            | 0.110                                        | 0.01           | 1778        | 1760            | 0.011                                            | 231.0   | 203          |
| 10                      | 0.010                                        | 0.100                                            | 0.110                                        | 0.02           | 1778        | 1743            | 0.011                                            | 171.4   | 203          |
| 10                      | 0.010                                        | 0.100                                            | 0.110                                        | 0.03           | 1778        | 1725            | 0.012                                            | 136.4   | 203          |
| 10                      | 0.010                                        | 0.150                                            | 0.160                                        | 0.01           | 1778        | 1760            | 0.011                                            | 240.1   | 203          |
| 10                      | 0.010                                        | 0.150                                            | 0.160                                        | 0.02           | 1778        | 1743            | 0.011                                            | 180.8   | 203          |
| 10                      | 0.010                                        | 0.150                                            | 0.160                                        | 0.03           | 1778        | 1725            | 0.012                                            | 145.7   | 203          |
| 10                      | 0.010                                        | 0.200                                            | 0.210                                        | 0.01           | 1778        | 1760            | 0.011                                            | 245.7   | 203          |
| 10                      | 0.010                                        | 0.200                                            | 0.210                                        | 0.02           | 1778        | 1743            | 0.011                                            | 186.6   | 203          |
| 10                      | 0.010                                        | 0.200                                            | 0.210                                        | 0.03           | 1778        | 1725            | 0.012                                            | 151.5   | 203          |
| 10                      | 0.050                                        | 0.025                                            | 0.075                                        | 0.01           | 1200        | 1188            | 0.052                                            | 98.3    | 205          |
| 10                      | 0.050                                        | 0.025                                            | 0.075                                        | 0.02           | 1200        | 1176            | 0.054                                            | 43.5    | 205          |
| 10                      | 0.050                                        | 0.025                                            | 0.075                                        | 0.03           | 1200        | 1164            | 0.056                                            | 16.0    | 205          |

| $h$ (g/m <sup>3</sup> ) | $\theta_1$ (m <sup>3</sup> /m <sup>3</sup> ) | $\Delta\theta$ (m <sup>3</sup> /m <sup>3</sup> ) | $\theta_2$ (m <sup>3</sup> /m <sup>3</sup> ) | $\sigma_N$ (-) | $N_1$ (cph) | $\hat{N}$ (cph) | $\hat{\theta}$ (m <sup>3</sup> /m <sup>3</sup> ) | $R$ (m) | $R_{86}$ (m) |
|-------------------------|----------------------------------------------|--------------------------------------------------|----------------------------------------------|----------------|-------------|-----------------|--------------------------------------------------|---------|--------------|
| 10                      | 0.050                                        | 0.050                                            | 0.100                                        | 0.01           | 1200        | 1188            | 0.052                                            | 141.3   | 205          |
| 10                      | 0.050                                        | 0.050                                            | 0.100                                        | 0.02           | 1200        | 1176            | 0.054                                            | 81.5    | 205          |
| 10                      | 0.050                                        | 0.050                                            | 0.100                                        | 0.03           | 1200        | 1164            | 0.056                                            | 49.8    | 205          |
| 10                      | 0.050                                        | 0.100                                            | 0.150                                        | 0.01           | 1200        | 1188            | 0.052                                            | 177.4   | 205          |
| 10                      | 0.050                                        | 0.100                                            | 0.150                                        | 0.02           | 1200        | 1176            | 0.054                                            | 115.1   | 205          |
| 10                      | 0.050                                        | 0.100                                            | 0.150                                        | 0.03           | 1200        | 1164            | 0.056                                            | 80.9    | 205          |
| 10                      | 0.050                                        | 0.150                                            | 0.200                                        | 0.01           | 1200        | 1188            | 0.052                                            | 195.0   | 205          |
| 10                      | 0.050                                        | 0.150                                            | 0.200                                        | 0.02           | 1200        | 1176            | 0.054                                            | 132.1   | 205          |
| 10                      | 0.050                                        | 0.150                                            | 0.200                                        | 0.03           | 1200        | 1164            | 0.056                                            | 96.8    | 205          |
| 10                      | 0.050                                        | 0.200                                            | 0.250                                        | 0.01           | 1200        | 1188            | 0.052                                            | 206.1   | 205          |
| 10                      | 0.050                                        | 0.200                                            | 0.250                                        | 0.02           | 1200        | 1176            | 0.054                                            | 142.9   | 205          |
| 10                      | 0.050                                        | 0.200                                            | 0.250                                        | 0.03           | 1200        | 1164            | 0.056                                            | 107.2   | 205          |
| 10                      | 0.100                                        | 0.025                                            | 0.125                                        | 0.01           | 987         | 977             | 0.104                                            | 47.1    | 197          |
| 10                      | 0.100                                        | 0.025                                            | 0.125                                        | 0.02           | 987         | 967             | 0.108                                            | 4.2     | 194          |
| 10                      | 0.100                                        | 0.025                                            | 0.125                                        | 0.03           | 987         | 958             | 0.111                                            | 0.2     | 194          |
| 10                      | 0.100                                        | 0.050                                            | 0.150                                        | 0.01           | 987         | 977             | 0.104                                            | 91.5    | 197          |
| 10                      | 0.100                                        | 0.050                                            | 0.150                                        | 0.02           | 987         | 967             | 0.108                                            | 38.2    | 194          |
| 10                      | 0.100                                        | 0.050                                            | 0.150                                        | 0.03           | 987         | 957             | 0.112                                            | 11.9    | 194          |
| 10                      | 0.100                                        | 0.100                                            | 0.200                                        | 0.01           | 987         | 977             | 0.104                                            | 134.8   | 197          |
| 10                      | 0.100                                        | 0.100                                            | 0.200                                        | 0.02           | 987         | 967             | 0.108                                            | 75.6    | 194          |
| 10                      | 0.100                                        | 0.100                                            | 0.200                                        | 0.03           | 987         | 957             | 0.112                                            | 44.8    | 194          |
| 10                      | 0.100                                        | 0.150                                            | 0.250                                        | 0.01           | 987         | 977             | 0.104                                            | 157.9   | 197          |
| 10                      | 0.100                                        | 0.150                                            | 0.250                                        | 0.02           | 987         | 967             | 0.108                                            | 96.5    | 194          |
| 10                      | 0.100                                        | 0.150                                            | 0.250                                        | 0.03           | 987         | 957             | 0.112                                            | 63.8    | 194          |
| 10                      | 0.100                                        | 0.200                                            | 0.300                                        | 0.01           | 987         | 977             | 0.104                                            | 173.0   | 197          |
| 10                      | 0.100                                        | 0.200                                            | 0.300                                        | 0.02           | 987         | 967             | 0.108                                            | 110.6   | 194          |
| 10                      | 0.100                                        | 0.200                                            | 0.300                                        | 0.03           | 987         | 957             | 0.112                                            | 76.7    | 194          |
| 10                      | 0.150                                        | 0.025                                            | 0.175                                        | 0.01           | 883         | 874             | 0.156                                            | 18.2    | 177          |
| 10                      | 0.150                                        | 0.025                                            | 0.175                                        | 0.02           | 883         | 865             | 0.161                                            | 0.3     | 177          |
| 10                      | 0.150                                        | 0.025                                            | 0.175                                        | 0.03           | 883         | 865             | 0.162                                            | 0.2     | 177          |
| 10                      | 0.150                                        | 0.050                                            | 0.200                                        | 0.01           | 883         | 874             | 0.156                                            | 58.7    | 177          |
| 10                      | 0.150                                        | 0.050                                            | 0.200                                        | 0.02           | 883         | 865             | 0.161                                            | 13.5    | 177          |
| 10                      | 0.150                                        | 0.050                                            | 0.200                                        | 0.03           | 883         | 857             | 0.167                                            | 1.3     | 174          |
| 10                      | 0.150                                        | 0.100                                            | 0.250                                        | 0.01           | 883         | 874             | 0.156                                            | 102.0   | 177          |
| 10                      | 0.150                                        | 0.100                                            | 0.250                                        | 0.02           | 883         | 865             | 0.161                                            | 48.7    | 177          |
| 10                      | 0.150                                        | 0.100                                            | 0.250                                        | 0.03           | 883         | 856             | 0.168                                            | 22.0    | 174          |
| 10                      | 0.150                                        | 0.150                                            | 0.300                                        | 0.01           | 883         | 874             | 0.156                                            | 126.7   | 177          |
| 10                      | 0.150                                        | 0.150                                            | 0.300                                        | 0.02           | 883         | 865             | 0.161                                            | 70.0    | 177          |
| 10                      | 0.150                                        | 0.150                                            | 0.300                                        | 0.03           | 883         | 856             | 0.168                                            | 40.8    | 174          |
| 10                      | 0.150                                        | 0.200                                            | 0.350                                        | 0.01           | 883         | 874             | 0.156                                            | 143.5   | 177          |
| 10                      | 0.150                                        | 0.200                                            | 0.350                                        | 0.02           | 883         | 865             | 0.161                                            | 84.8    | 177          |
| 10                      | 0.150                                        | 0.200                                            | 0.350                                        | 0.03           | 883         | 856             | 0.168                                            | 54.2    | 174          |
| 10                      | 0.200                                        | 0.025                                            | 0.225                                        | 0.01           | 816         | 807             | 0.207                                            | 4.2     | 160          |
| 10                      | 0.200                                        | 0.025                                            | 0.225                                        | 0.02           | 816         | 803             | 0.212                                            | 0.2     | 160          |
| 10                      | 0.200                                        | 0.025                                            | 0.225                                        | 0.03           | 816         | 803             | 0.212                                            | 0.2     | 160          |
| 10                      | 0.200                                        | 0.050                                            | 0.250                                        | 0.01           | 816         | 807             | 0.207                                            | 37.0    | 160          |
| 10                      | 0.200                                        | 0.050                                            | 0.250                                        | 0.02           | 816         | 799             | 0.215                                            | 2.9     | 160          |
| 10                      | 0.200                                        | 0.050                                            | 0.250                                        | 0.03           | 816         | 791             | 0.223                                            | 0.2     | 156          |
| 10                      | 0.200                                        | 0.100                                            | 0.300                                        | 0.01           | 816         | 807             | 0.207                                            | 77.3    | 160          |
| 10                      | 0.200                                        | 0.100                                            | 0.300                                        | 0.02           | 816         | 799             | 0.215                                            | 30.4    | 160          |
| 10                      | 0.200                                        | 0.100                                            | 0.300                                        | 0.03           | 816         | 791             | 0.223                                            | 8.5     | 156          |
| 10                      | 0.200                                        | 0.150                                            | 0.350                                        | 0.01           | 816         | 807             | 0.207                                            | 101.6   | 160          |
| 10                      | 0.200                                        | 0.150                                            | 0.350                                        | 0.02           | 816         | 799             | 0.215                                            | 50.3    | 156          |
| 10                      | 0.200                                        | 0.150                                            | 0.350                                        | 0.03           | 816         | 791             | 0.223                                            | 25.0    | 156          |
| 10                      | 0.200                                        | 0.200                                            | 0.400                                        | 0.01           | 816         | 807             | 0.207                                            | 118.6   | 160          |
| 10                      | 0.200                                        | 0.200                                            | 0.400                                        | 0.02           | 816         | 799             | 0.215                                            | 64.7    | 156          |
| 10                      | 0.200                                        | 0.200                                            | 0.400                                        | 0.03           | 816         | 791             | 0.223                                            | 37.5    | 156          |
| 10                      | 0.250                                        | 0.025                                            | 0.275                                        | 0.01           | 766         | 758             | 0.259                                            | 1.4     | 144          |



| $h$ (g/m <sup>3</sup> ) | $\theta_1$ (m <sup>3</sup> /m <sup>3</sup> ) | $\Delta\theta$ (m <sup>3</sup> /m <sup>3</sup> ) | $\theta_2$ (m <sup>3</sup> /m <sup>3</sup> ) | $\sigma_N$ (-) | $N_1$ (cph) | $\hat{N}$ (cph) | $\hat{\theta}$ (m <sup>3</sup> /m <sup>3</sup> ) | $R$ (m) | $R_{86}$ (m) |
|-------------------------|----------------------------------------------|--------------------------------------------------|----------------------------------------------|----------------|-------------|-----------------|--------------------------------------------------|---------|--------------|
| 10                      | 0.250                                        | 0.025                                            | 0.275                                        | 0.02           | 766         | 756             | 0.262                                            | 0.2     | 144          |
| 10                      | 0.250                                        | 0.025                                            | 0.275                                        | 0.03           | 766         | 756             | 0.262                                            | 0.2     | 144          |
| 10                      | 0.250                                        | 0.050                                            | 0.300                                        | 0.01           | 766         | 758             | 0.259                                            | 22.9    | 144          |
| 10                      | 0.250                                        | 0.050                                            | 0.300                                        | 0.02           | 766         | 751             | 0.268                                            | 1.1     | 141          |
| 10                      | 0.250                                        | 0.050                                            | 0.300                                        | 0.03           | 766         | 747             | 0.273                                            | 0.2     | 141          |
| 10                      | 0.250                                        | 0.100                                            | 0.350                                        | 0.01           | 766         | 758             | 0.259                                            | 58.9    | 144          |
| 10                      | 0.250                                        | 0.100                                            | 0.350                                        | 0.02           | 766         | 751             | 0.268                                            | 18.4    | 141          |
| 10                      | 0.250                                        | 0.100                                            | 0.350                                        | 0.03           | 766         | 743             | 0.278                                            | 2.9     | 138          |
| 10                      | 0.250                                        | 0.150                                            | 0.400                                        | 0.01           | 766         | 758             | 0.259                                            | 81.9    | 144          |
| 10                      | 0.250                                        | 0.150                                            | 0.400                                        | 0.02           | 766         | 751             | 0.268                                            | 36.2    | 141          |
| 10                      | 0.250                                        | 0.150                                            | 0.400                                        | 0.03           | 766         | 743             | 0.278                                            | 14.6    | 138          |
| 10                      | 0.250                                        | 0.200                                            | 0.450                                        | 0.01           | 766         | 758             | 0.259                                            | 98.2    | 144          |
| 10                      | 0.250                                        | 0.200                                            | 0.450                                        | 0.02           | 766         | 751             | 0.268                                            | 49.4    | 141          |
| 10                      | 0.250                                        | 0.200                                            | 0.450                                        | 0.03           | 766         | 743             | 0.278                                            | 25.8    | 138          |
| 10                      | 0.300                                        | 0.025                                            | 0.325                                        | 0.01           | 726         | 719             | 0.310                                            | 0.7     | 131          |
| 10                      | 0.300                                        | 0.025                                            | 0.325                                        | 0.02           | 726         | 718             | 0.312                                            | 0.2     | 131          |
| 10                      | 0.300                                        | 0.025                                            | 0.325                                        | 0.03           | 726         | 718             | 0.312                                            | 0.2     | 131          |
| 10                      | 0.300                                        | 0.050                                            | 0.350                                        | 0.01           | 726         | 719             | 0.310                                            | 13.8    | 131          |
| 10                      | 0.300                                        | 0.050                                            | 0.350                                        | 0.02           | 726         | 712             | 0.321                                            | 0.5     | 129          |
| 10                      | 0.300                                        | 0.050                                            | 0.350                                        | 0.03           | 726         | 711             | 0.323                                            | 0.2     | 129          |
| 10                      | 0.300                                        | 0.100                                            | 0.400                                        | 0.01           | 726         | 719             | 0.310                                            | 45.6    | 131          |
| 10                      | 0.300                                        | 0.100                                            | 0.400                                        | 0.02           | 726         | 712             | 0.321                                            | 10.5    | 129          |
| 10                      | 0.300                                        | 0.100                                            | 0.400                                        | 0.03           | 726         | 705             | 0.332                                            | 1.5     | 127          |
| 10                      | 0.300                                        | 0.150                                            | 0.450                                        | 0.01           | 726         | 719             | 0.310                                            | 66.8    | 131          |
| 10                      | 0.300                                        | 0.150                                            | 0.450                                        | 0.02           | 726         | 712             | 0.321                                            | 26.4    | 129          |
| 10                      | 0.300                                        | 0.150                                            | 0.450                                        | 0.03           | 726         | 705             | 0.332                                            | 7.9     | 127          |
| 10                      | 0.300                                        | 0.200                                            | 0.500                                        | 0.01           | 726         | 719             | 0.310                                            | 82.3    | 131          |
| 10                      | 0.300                                        | 0.200                                            | 0.500                                        | 0.02           | 726         | 712             | 0.321                                            | 38.3    | 129          |
| 10                      | 0.300                                        | 0.200                                            | 0.500                                        | 0.03           | 726         | 705             | 0.332                                            | 17.6    | 127          |
| 10                      | 0.350                                        | 0.025                                            | 0.375                                        | 0.01           | 694         | 687             | 0.361                                            | 0.3     | 122          |
| 10                      | 0.350                                        | 0.025                                            | 0.375                                        | 0.02           | 694         | 687             | 0.362                                            | 0.2     | 122          |
| 10                      | 0.350                                        | 0.025                                            | 0.375                                        | 0.03           | 694         | 687             | 0.362                                            | 0.2     | 122          |
| 10                      | 0.350                                        | 0.050                                            | 0.400                                        | 0.01           | 694         | 687             | 0.362                                            | 7.8     | 122          |
| 10                      | 0.350                                        | 0.050                                            | 0.400                                        | 0.02           | 694         | 680             | 0.373                                            | 0.2     | 120          |
| 10                      | 0.350                                        | 0.050                                            | 0.400                                        | 0.03           | 694         | 680             | 0.373                                            | 0.2     | 120          |
| 10                      | 0.350                                        | 0.100                                            | 0.450                                        | 0.01           | 694         | 687             | 0.362                                            | 36.3    | 122          |
| 10                      | 0.350                                        | 0.100                                            | 0.450                                        | 0.02           | 694         | 680             | 0.374                                            | 5.7     | 120          |
| 10                      | 0.350                                        | 0.100                                            | 0.450                                        | 0.03           | 694         | 673             | 0.386                                            | 0.9     | 118          |
| 10                      | 0.350                                        | 0.150                                            | 0.500                                        | 0.01           | 694         | 687             | 0.362                                            | 55.6    | 122          |
| 10                      | 0.350                                        | 0.150                                            | 0.500                                        | 0.02           | 694         | 680             | 0.374                                            | 19.4    | 120          |
| 10                      | 0.350                                        | 0.150                                            | 0.500                                        | 0.03           | 694         | 673             | 0.386                                            | 4.2     | 118          |
| 10                      | 0.350                                        | 0.200                                            | 0.550                                        | 0.01           | 694         | 687             | 0.362                                            | 70.1    | 122          |
| 10                      | 0.350                                        | 0.200                                            | 0.550                                        | 0.02           | 694         | 680             | 0.374                                            | 30.4    | 120          |
| 10                      | 0.350                                        | 0.200                                            | 0.550                                        | 0.03           | 694         | 673             | 0.386                                            | 11.9    | 118          |
| 10                      | 0.400                                        | 0.025                                            | 0.425                                        | 0.01           | 665         | 659             | 0.412                                            | 0.2     | 116          |
| 10                      | 0.400                                        | 0.025                                            | 0.425                                        | 0.02           | 665         | 659             | 0.412                                            | 0.2     | 116          |
| 10                      | 0.400                                        | 0.025                                            | 0.425                                        | 0.03           | 665         | 659             | 0.412                                            | 0.2     | 116          |
| 10                      | 0.400                                        | 0.050                                            | 0.450                                        | 0.01           | 665         | 659             | 0.413                                            | 4.4     | 116          |
| 10                      | 0.400                                        | 0.050                                            | 0.450                                        | 0.02           | 665         | 654             | 0.423                                            | 0.2     | 115          |
| 10                      | 0.400                                        | 0.050                                            | 0.450                                        | 0.03           | 665         | 654             | 0.423                                            | 0.2     | 115          |
| 10                      | 0.400                                        | 0.100                                            | 0.500                                        | 0.01           | 665         | 659             | 0.413                                            | 29.7    | 116          |
| 10                      | 0.400                                        | 0.100                                            | 0.500                                        | 0.02           | 665         | 652             | 0.426                                            | 3.3     | 114          |
| 10                      | 0.400                                        | 0.100                                            | 0.500                                        | 0.03           | 665         | 646             | 0.439                                            | 0.6     | 114          |
| 10                      | 0.400                                        | 0.150                                            | 0.550                                        | 0.01           | 665         | 659             | 0.413                                            | 47.4    | 116          |
| 10                      | 0.400                                        | 0.150                                            | 0.550                                        | 0.02           | 665         | 652             | 0.426                                            | 14.4    | 114          |
| 10                      | 0.400                                        | 0.150                                            | 0.550                                        | 0.03           | 665         | 646             | 0.440                                            | 2.6     | 114          |
| 10                      | 0.400                                        | 0.200                                            | 0.600                                        | 0.01           | 665         | 659             | 0.413                                            | 61.2    | 116          |
| 10                      | 0.400                                        | 0.200                                            | 0.600                                        | 0.02           | 665         | 652             | 0.426                                            | 24.7    | 114          |

| $h$ (g/m <sup>3</sup> ) | $\theta_1$ (m <sup>3</sup> /m <sup>3</sup> ) | $\Delta\theta$ (m <sup>3</sup> /m <sup>3</sup> ) | $\theta_2$ (m <sup>3</sup> /m <sup>3</sup> ) | $\sigma_N$ (-) | $N_1$ (cph) | $\hat{N}$ (cph) | $\hat{\theta}$ (m <sup>3</sup> /m <sup>3</sup> ) | $R$ (m) | $R_{86}$ (m) |
|-------------------------|----------------------------------------------|--------------------------------------------------|----------------------------------------------|----------------|-------------|-----------------|--------------------------------------------------|---------|--------------|
| 10                      | 0.400                                        | 0.200                                            | 0.600                                        | 0.03           | 665         | 645             | 0.440                                            | 7.8     | 114          |
| 10                      | 0.450                                        | 0.025                                            | 0.475                                        | 0.01           | 641         | 635             | 0.462                                            | 0.2     | 113          |
| 10                      | 0.450                                        | 0.025                                            | 0.475                                        | 0.02           | 641         | 635             | 0.462                                            | 0.2     | 113          |
| 10                      | 0.450                                        | 0.025                                            | 0.475                                        | 0.03           | 641         | 635             | 0.462                                            | 0.2     | 113          |
| 10                      | 0.450                                        | 0.050                                            | 0.500                                        | 0.01           | 641         | 634             | 0.464                                            | 2.8     | 113          |
| 10                      | 0.450                                        | 0.050                                            | 0.500                                        | 0.02           | 641         | 630             | 0.473                                            | 0.2     | 113          |
| 10                      | 0.450                                        | 0.050                                            | 0.500                                        | 0.03           | 641         | 630             | 0.473                                            | 0.2     | 113          |
| 10                      | 0.450                                        | 0.100                                            | 0.550                                        | 0.01           | 641         | 634             | 0.464                                            | 24.8    | 113          |
| 10                      | 0.450                                        | 0.100                                            | 0.550                                        | 0.02           | 641         | 628             | 0.479                                            | 2.3     | 113          |
| 10                      | 0.450                                        | 0.100                                            | 0.550                                        | 0.03           | 641         | 622             | 0.494                                            | 0.3     | 113          |
| 10                      | 0.450                                        | 0.150                                            | 0.600                                        | 0.01           | 641         | 634             | 0.464                                            | 41.7    | 113          |
| 10                      | 0.450                                        | 0.150                                            | 0.600                                        | 0.02           | 641         | 628             | 0.479                                            | 10.5    | 113          |
| 10                      | 0.450                                        | 0.150                                            | 0.600                                        | 0.03           | 641         | 622             | 0.493                                            | 1.9     | 113          |
| 10                      | 0.450                                        | 0.200                                            | 0.650                                        | 0.01           | 641         | 634             | 0.464                                            | 54.7    | 113          |
| 10                      | 0.450                                        | 0.200                                            | 0.650                                        | 0.02           | 641         | 628             | 0.479                                            | 20.3    | 113          |
| 10                      | 0.450                                        | 0.200                                            | 0.650                                        | 0.03           | 641         | 622             | 0.494                                            | 5.1     | 113          |
| 10                      | 0.500                                        | 0.025                                            | 0.525                                        | 0.01           | 619         | 614             | 0.512                                            | 0.2     | 113          |
| 10                      | 0.500                                        | 0.025                                            | 0.525                                        | 0.02           | 619         | 614             | 0.512                                            | 0.2     | 113          |
| 10                      | 0.500                                        | 0.025                                            | 0.525                                        | 0.03           | 619         | 614             | 0.512                                            | 0.2     | 113          |
| 10                      | 0.500                                        | 0.050                                            | 0.550                                        | 0.01           | 619         | 613             | 0.515                                            | 2.0     | 113          |
| 10                      | 0.500                                        | 0.050                                            | 0.550                                        | 0.02           | 619         | 610             | 0.523                                            | 0.2     | 113          |
| 10                      | 0.500                                        | 0.050                                            | 0.550                                        | 0.03           | 619         | 610             | 0.523                                            | 0.2     | 113          |
| 10                      | 0.500                                        | 0.100                                            | 0.600                                        | 0.01           | 619         | 613             | 0.515                                            | 21.1    | 113          |
| 10                      | 0.500                                        | 0.100                                            | 0.600                                        | 0.02           | 619         | 607             | 0.531                                            | 1.7     | 113          |
| 10                      | 0.500                                        | 0.100                                            | 0.600                                        | 0.03           | 619         | 601             | 0.546                                            | 0.2     | 113          |
| 10                      | 0.500                                        | 0.150                                            | 0.650                                        | 0.01           | 619         | 613             | 0.515                                            | 37.6    | 113          |
| 10                      | 0.500                                        | 0.150                                            | 0.650                                        | 0.02           | 619         | 607             | 0.531                                            | 7.6     | 113          |
| 10                      | 0.500                                        | 0.150                                            | 0.650                                        | 0.03           | 619         | 601             | 0.547                                            | 1.4     | 113          |
| 10                      | 0.500                                        | 0.200                                            | 0.700                                        | 0.01           | 619         | 613             | 0.515                                            | 50.1    | 113          |
| 10                      | 0.500                                        | 0.200                                            | 0.700                                        | 0.02           | 619         | 607             | 0.531                                            | 16.9    | 113          |
| 10                      | 0.500                                        | 0.200                                            | 0.700                                        | 0.03           | 619         | 601             | 0.548                                            | 3.6     | 113          |
| 15                      | 0.010                                        | 0.025                                            | 0.035                                        | 0.01           | 1696        | 1679            | 0.011                                            | 172.0   | 192          |
| 15                      | 0.010                                        | 0.025                                            | 0.035                                        | 0.02           | 1696        | 1662            | 0.011                                            | 114.8   | 192          |
| 15                      | 0.010                                        | 0.025                                            | 0.035                                        | 0.03           | 1696        | 1645            | 0.012                                            | 82.6    | 192          |
| 15                      | 0.010                                        | 0.050                                            | 0.060                                        | 0.01           | 1696        | 1679            | 0.011                                            | 200.9   | 192          |
| 15                      | 0.010                                        | 0.050                                            | 0.060                                        | 0.02           | 1696        | 1662            | 0.011                                            | 143.2   | 192          |
| 15                      | 0.010                                        | 0.050                                            | 0.060                                        | 0.03           | 1696        | 1645            | 0.012                                            | 110.0   | 192          |
| 15                      | 0.010                                        | 0.100                                            | 0.110                                        | 0.01           | 1696        | 1679            | 0.011                                            | 221.2   | 192          |
| 15                      | 0.010                                        | 0.100                                            | 0.110                                        | 0.02           | 1696        | 1662            | 0.011                                            | 163.5   | 192          |
| 15                      | 0.010                                        | 0.100                                            | 0.110                                        | 0.03           | 1696        | 1645            | 0.012                                            | 130.0   | 192          |
| 15                      | 0.010                                        | 0.150                                            | 0.160                                        | 0.01           | 1696        | 1679            | 0.011                                            | 230.1   | 192          |
| 15                      | 0.010                                        | 0.150                                            | 0.160                                        | 0.02           | 1696        | 1662            | 0.011                                            | 172.5   | 192          |
| 15                      | 0.010                                        | 0.150                                            | 0.160                                        | 0.03           | 1696        | 1645            | 0.012                                            | 138.9   | 192          |
| 15                      | 0.010                                        | 0.200                                            | 0.210                                        | 0.01           | 1696        | 1679            | 0.011                                            | 235.5   | 192          |
| 15                      | 0.010                                        | 0.200                                            | 0.210                                        | 0.02           | 1696        | 1662            | 0.011                                            | 178.0   | 192          |
| 15                      | 0.010                                        | 0.200                                            | 0.210                                        | 0.03           | 1696        | 1645            | 0.012                                            | 144.3   | 192          |
| 15                      | 0.050                                        | 0.025                                            | 0.075                                        | 0.01           | 1141        | 1129            | 0.052                                            | 94.1    | 193          |
| 15                      | 0.050                                        | 0.025                                            | 0.075                                        | 0.02           | 1141        | 1118            | 0.054                                            | 41.7    | 193          |
| 15                      | 0.050                                        | 0.025                                            | 0.075                                        | 0.03           | 1141        | 1106            | 0.056                                            | 15.4    | 193          |
| 15                      | 0.050                                        | 0.050                                            | 0.100                                        | 0.01           | 1141        | 1129            | 0.052                                            | 135.2   | 193          |
| 15                      | 0.050                                        | 0.050                                            | 0.100                                        | 0.02           | 1141        | 1118            | 0.054                                            | 77.9    | 193          |
| 15                      | 0.050                                        | 0.050                                            | 0.100                                        | 0.03           | 1141        | 1106            | 0.056                                            | 47.6    | 193          |
| 15                      | 0.050                                        | 0.100                                            | 0.150                                        | 0.01           | 1141        | 1129            | 0.052                                            | 169.9   | 193          |
| 15                      | 0.050                                        | 0.100                                            | 0.150                                        | 0.02           | 1141        | 1118            | 0.054                                            | 110.0   | 193          |
| 15                      | 0.050                                        | 0.100                                            | 0.150                                        | 0.03           | 1141        | 1106            | 0.056                                            | 77.2    | 193          |
| 15                      | 0.050                                        | 0.150                                            | 0.200                                        | 0.01           | 1141        | 1129            | 0.052                                            | 186.9   | 193          |
| 15                      | 0.050                                        | 0.150                                            | 0.200                                        | 0.02           | 1141        | 1118            | 0.054                                            | 126.2   | 193          |
| 15                      | 0.050                                        | 0.150                                            | 0.200                                        | 0.03           | 1141        | 1106            | 0.056                                            | 92.4    | 193          |

| $h$ (g/m <sup>3</sup> ) | $\theta_1$ (m <sup>3</sup> /m <sup>3</sup> ) | $\Delta\theta$ (m <sup>3</sup> /m <sup>3</sup> ) | $\theta_2$ (m <sup>3</sup> /m <sup>3</sup> ) | $\sigma_N$ (-) | $N_1$ (cph) | $\hat{N}$ (cph) | $\hat{\theta}$ (m <sup>3</sup> /m <sup>3</sup> ) | $R$ (m) | $R_{86}$ (m) |
|-------------------------|----------------------------------------------|--------------------------------------------------|----------------------------------------------|----------------|-------------|-----------------|--------------------------------------------------|---------|--------------|
| 15                      | 0.050                                        | 0.200                                            | 0.250                                        | 0.01           | 1141        | 1129            | 0.052                                            | 197.6   | 193          |
| 15                      | 0.050                                        | 0.200                                            | 0.250                                        | 0.02           | 1141        | 1118            | 0.054                                            | 136.5   | 193          |
| 15                      | 0.050                                        | 0.200                                            | 0.250                                        | 0.03           | 1141        | 1106            | 0.056                                            | 102.2   | 193          |
| 15                      | 0.100                                        | 0.025                                            | 0.125                                        | 0.01           | 937         | 928             | 0.104                                            | 44.9    | 186          |
| 15                      | 0.100                                        | 0.025                                            | 0.125                                        | 0.02           | 937         | 918             | 0.108                                            | 4.0     | 183          |
| 15                      | 0.100                                        | 0.025                                            | 0.125                                        | 0.03           | 937         | 910             | 0.111                                            | 0.2     | 183          |
| 15                      | 0.100                                        | 0.050                                            | 0.150                                        | 0.01           | 937         | 928             | 0.104                                            | 87.4    | 186          |
| 15                      | 0.100                                        | 0.050                                            | 0.150                                        | 0.02           | 937         | 918             | 0.108                                            | 36.3    | 183          |
| 15                      | 0.100                                        | 0.050                                            | 0.150                                        | 0.03           | 937         | 909             | 0.112                                            | 11.2    | 183          |
| 15                      | 0.100                                        | 0.100                                            | 0.200                                        | 0.01           | 937         | 928             | 0.104                                            | 128.7   | 186          |
| 15                      | 0.100                                        | 0.100                                            | 0.200                                        | 0.02           | 937         | 918             | 0.108                                            | 72.0    | 183          |
| 15                      | 0.100                                        | 0.100                                            | 0.200                                        | 0.03           | 937         | 909             | 0.112                                            | 42.6    | 183          |
| 15                      | 0.100                                        | 0.150                                            | 0.250                                        | 0.01           | 937         | 928             | 0.104                                            | 150.8   | 186          |
| 15                      | 0.100                                        | 0.150                                            | 0.250                                        | 0.02           | 937         | 918             | 0.108                                            | 91.9    | 183          |
| 15                      | 0.100                                        | 0.150                                            | 0.250                                        | 0.03           | 937         | 909             | 0.112                                            | 60.6    | 183          |
| 15                      | 0.100                                        | 0.200                                            | 0.300                                        | 0.01           | 937         | 928             | 0.104                                            | 165.4   | 186          |
| 15                      | 0.100                                        | 0.200                                            | 0.300                                        | 0.02           | 937         | 918             | 0.108                                            | 105.3   | 183          |
| 15                      | 0.100                                        | 0.200                                            | 0.300                                        | 0.03           | 937         | 909             | 0.112                                            | 72.9    | 183          |
| 15                      | 0.150                                        | 0.025                                            | 0.175                                        | 0.01           | 838         | 830             | 0.156                                            | 17.2    | 167          |
| 15                      | 0.150                                        | 0.025                                            | 0.175                                        | 0.02           | 838         | 822             | 0.161                                            | 0.3     | 167          |
| 15                      | 0.150                                        | 0.025                                            | 0.175                                        | 0.03           | 838         | 821             | 0.162                                            | 0.2     | 167          |
| 15                      | 0.150                                        | 0.050                                            | 0.200                                        | 0.01           | 838         | 830             | 0.156                                            | 55.9    | 167          |
| 15                      | 0.150                                        | 0.050                                            | 0.200                                        | 0.02           | 838         | 821             | 0.161                                            | 12.6    | 167          |
| 15                      | 0.150                                        | 0.050                                            | 0.200                                        | 0.03           | 838         | 813             | 0.168                                            | 1.2     | 164          |
| 15                      | 0.150                                        | 0.100                                            | 0.250                                        | 0.01           | 838         | 830             | 0.156                                            | 97.1    | 167          |
| 15                      | 0.150                                        | 0.100                                            | 0.250                                        | 0.02           | 838         | 821             | 0.161                                            | 46.2    | 167          |
| 15                      | 0.150                                        | 0.100                                            | 0.250                                        | 0.03           | 838         | 813             | 0.168                                            | 20.7    | 164          |
| 15                      | 0.150                                        | 0.150                                            | 0.300                                        | 0.01           | 838         | 830             | 0.156                                            | 120.7   | 167          |
| 15                      | 0.150                                        | 0.150                                            | 0.300                                        | 0.02           | 838         | 821             | 0.161                                            | 66.4    | 167          |
| 15                      | 0.150                                        | 0.150                                            | 0.300                                        | 0.03           | 838         | 813             | 0.168                                            | 38.6    | 164          |
| 15                      | 0.150                                        | 0.200                                            | 0.350                                        | 0.01           | 838         | 830             | 0.156                                            | 136.7   | 167          |
| 15                      | 0.150                                        | 0.200                                            | 0.350                                        | 0.02           | 838         | 821             | 0.161                                            | 80.5    | 167          |
| 15                      | 0.150                                        | 0.200                                            | 0.350                                        | 0.03           | 838         | 813             | 0.168                                            | 51.3    | 164          |
| 15                      | 0.200                                        | 0.025                                            | 0.225                                        | 0.01           | 774         | 767             | 0.207                                            | 4.0     | 151          |
| 15                      | 0.200                                        | 0.025                                            | 0.225                                        | 0.02           | 774         | 762             | 0.212                                            | 0.2     | 151          |
| 15                      | 0.200                                        | 0.025                                            | 0.225                                        | 0.03           | 774         | 762             | 0.212                                            | 0.2     | 151          |
| 15                      | 0.200                                        | 0.050                                            | 0.250                                        | 0.01           | 774         | 767             | 0.207                                            | 35.0    | 151          |
| 15                      | 0.200                                        | 0.050                                            | 0.250                                        | 0.02           | 774         | 759             | 0.215                                            | 2.8     | 151          |
| 15                      | 0.200                                        | 0.050                                            | 0.250                                        | 0.03           | 774         | 752             | 0.223                                            | 0.2     | 148          |
| 15                      | 0.200                                        | 0.100                                            | 0.300                                        | 0.01           | 774         | 767             | 0.207                                            | 73.3    | 151          |
| 15                      | 0.200                                        | 0.100                                            | 0.300                                        | 0.02           | 774         | 759             | 0.215                                            | 28.6    | 148          |
| 15                      | 0.200                                        | 0.100                                            | 0.300                                        | 0.03           | 774         | 751             | 0.223                                            | 7.8     | 148          |
| 15                      | 0.200                                        | 0.150                                            | 0.350                                        | 0.01           | 774         | 767             | 0.207                                            | 96.5    | 151          |
| 15                      | 0.200                                        | 0.150                                            | 0.350                                        | 0.02           | 774         | 759             | 0.215                                            | 47.6    | 148          |
| 15                      | 0.200                                        | 0.150                                            | 0.350                                        | 0.03           | 774         | 751             | 0.223                                            | 23.4    | 148          |
| 15                      | 0.200                                        | 0.200                                            | 0.400                                        | 0.01           | 774         | 767             | 0.207                                            | 112.6   | 151          |
| 15                      | 0.200                                        | 0.200                                            | 0.400                                        | 0.02           | 774         | 759             | 0.215                                            | 61.2    | 148          |
| 15                      | 0.200                                        | 0.200                                            | 0.400                                        | 0.03           | 774         | 751             | 0.223                                            | 35.3    | 148          |
| 15                      | 0.250                                        | 0.025                                            | 0.275                                        | 0.01           | 727         | 720             | 0.259                                            | 1.4     | 136          |
| 15                      | 0.250                                        | 0.025                                            | 0.275                                        | 0.02           | 727         | 718             | 0.262                                            | 0.2     | 136          |
| 15                      | 0.250                                        | 0.025                                            | 0.275                                        | 0.03           | 727         | 718             | 0.262                                            | 0.2     | 136          |
| 15                      | 0.250                                        | 0.050                                            | 0.300                                        | 0.01           | 727         | 720             | 0.259                                            | 21.5    | 136          |
| 15                      | 0.250                                        | 0.050                                            | 0.300                                        | 0.02           | 727         | 713             | 0.268                                            | 1.1     | 133          |
| 15                      | 0.250                                        | 0.050                                            | 0.300                                        | 0.03           | 727         | 709             | 0.273                                            | 0.2     | 133          |
| 15                      | 0.250                                        | 0.100                                            | 0.350                                        | 0.01           | 727         | 720             | 0.259                                            | 55.7    | 136          |
| 15                      | 0.250                                        | 0.100                                            | 0.350                                        | 0.02           | 727         | 713             | 0.268                                            | 17.2    | 133          |
| 15                      | 0.250                                        | 0.100                                            | 0.350                                        | 0.03           | 727         | 706             | 0.278                                            | 2.8     | 131          |
| 15                      | 0.250                                        | 0.150                                            | 0.400                                        | 0.01           | 727         | 720             | 0.259                                            | 77.5    | 136          |

| $h$ (g/m <sup>3</sup> ) | $\theta_1$ (m <sup>3</sup> /m <sup>3</sup> ) | $\Delta\theta$ (m <sup>3</sup> /m <sup>3</sup> ) | $\theta_2$ (m <sup>3</sup> /m <sup>3</sup> ) | $\sigma_N$ (-) | $N_1$ (cph) | $\hat{N}$ (cph) | $\hat{\theta}$ (m <sup>3</sup> /m <sup>3</sup> ) | $R$ (m) | $R_{86}$ (m) |
|-------------------------|----------------------------------------------|--------------------------------------------------|----------------------------------------------|----------------|-------------|-----------------|--------------------------------------------------|---------|--------------|
| 15                      | 0.250                                        | 0.150                                            | 0.400                                        | 0.02           | 727         | 713             | 0.268                                            | 34.1    | 133          |
| 15                      | 0.250                                        | 0.150                                            | 0.400                                        | 0.03           | 727         | 706             | 0.278                                            | 13.5    | 131          |
| 15                      | 0.250                                        | 0.200                                            | 0.450                                        | 0.01           | 727         | 720             | 0.259                                            | 93.0    | 136          |
| 15                      | 0.250                                        | 0.200                                            | 0.450                                        | 0.02           | 727         | 713             | 0.268                                            | 46.6    | 133          |
| 15                      | 0.250                                        | 0.200                                            | 0.450                                        | 0.03           | 727         | 705             | 0.278                                            | 24.1    | 131          |
| 15                      | 0.300                                        | 0.025                                            | 0.325                                        | 0.01           | 690         | 683             | 0.310                                            | 0.6     | 124          |
| 15                      | 0.300                                        | 0.025                                            | 0.325                                        | 0.02           | 690         | 682             | 0.312                                            | 0.2     | 124          |
| 15                      | 0.300                                        | 0.025                                            | 0.325                                        | 0.03           | 690         | 682             | 0.312                                            | 0.2     | 124          |
| 15                      | 0.300                                        | 0.050                                            | 0.350                                        | 0.01           | 690         | 683             | 0.310                                            | 12.8    | 124          |
| 15                      | 0.300                                        | 0.050                                            | 0.350                                        | 0.02           | 690         | 676             | 0.321                                            | 0.5     | 122          |
| 15                      | 0.300                                        | 0.050                                            | 0.350                                        | 0.03           | 690         | 675             | 0.323                                            | 0.2     | 122          |
| 15                      | 0.300                                        | 0.100                                            | 0.400                                        | 0.01           | 690         | 683             | 0.310                                            | 43.1    | 124          |
| 15                      | 0.300                                        | 0.100                                            | 0.400                                        | 0.02           | 690         | 676             | 0.321                                            | 9.7     | 122          |
| 15                      | 0.300                                        | 0.100                                            | 0.400                                        | 0.03           | 690         | 669             | 0.332                                            | 1.4     | 120          |
| 15                      | 0.300                                        | 0.150                                            | 0.450                                        | 0.01           | 690         | 683             | 0.310                                            | 63.1    | 124          |
| 15                      | 0.300                                        | 0.150                                            | 0.450                                        | 0.02           | 690         | 676             | 0.321                                            | 24.8    | 122          |
| 15                      | 0.300                                        | 0.150                                            | 0.450                                        | 0.03           | 690         | 669             | 0.332                                            | 7.2     | 120          |
| 15                      | 0.300                                        | 0.200                                            | 0.500                                        | 0.01           | 690         | 683             | 0.310                                            | 77.7    | 124          |
| 15                      | 0.300                                        | 0.200                                            | 0.500                                        | 0.02           | 690         | 676             | 0.321                                            | 36.1    | 122          |
| 15                      | 0.300                                        | 0.200                                            | 0.500                                        | 0.03           | 690         | 669             | 0.332                                            | 16.4    | 120          |
| 15                      | 0.350                                        | 0.025                                            | 0.375                                        | 0.01           | 659         | 653             | 0.361                                            | 0.3     | 115          |
| 15                      | 0.350                                        | 0.025                                            | 0.375                                        | 0.02           | 659         | 652             | 0.362                                            | 0.2     | 115          |
| 15                      | 0.350                                        | 0.025                                            | 0.375                                        | 0.03           | 659         | 652             | 0.362                                            | 0.2     | 115          |
| 15                      | 0.350                                        | 0.050                                            | 0.400                                        | 0.01           | 659         | 652             | 0.362                                            | 7.1     | 115          |
| 15                      | 0.350                                        | 0.050                                            | 0.400                                        | 0.02           | 659         | 646             | 0.373                                            | 0.2     | 114          |
| 15                      | 0.350                                        | 0.050                                            | 0.400                                        | 0.03           | 659         | 646             | 0.373                                            | 0.2     | 114          |
| 15                      | 0.350                                        | 0.100                                            | 0.450                                        | 0.01           | 659         | 652             | 0.362                                            | 34.2    | 115          |
| 15                      | 0.350                                        | 0.100                                            | 0.450                                        | 0.02           | 659         | 646             | 0.374                                            | 5.2     | 114          |
| 15                      | 0.350                                        | 0.100                                            | 0.450                                        | 0.03           | 659         | 640             | 0.386                                            | 0.9     | 111          |
| 15                      | 0.350                                        | 0.150                                            | 0.500                                        | 0.01           | 659         | 652             | 0.362                                            | 52.3    | 115          |
| 15                      | 0.350                                        | 0.150                                            | 0.500                                        | 0.02           | 659         | 646             | 0.374                                            | 18.1    | 114          |
| 15                      | 0.350                                        | 0.150                                            | 0.500                                        | 0.03           | 659         | 639             | 0.387                                            | 3.8     | 111          |
| 15                      | 0.350                                        | 0.200                                            | 0.550                                        | 0.01           | 659         | 652             | 0.362                                            | 66.1    | 115          |
| 15                      | 0.350                                        | 0.200                                            | 0.550                                        | 0.02           | 659         | 646             | 0.374                                            | 28.6    | 114          |
| 15                      | 0.350                                        | 0.200                                            | 0.550                                        | 0.03           | 659         | 639             | 0.387                                            | 10.9    | 111          |
| 15                      | 0.400                                        | 0.025                                            | 0.425                                        | 0.01           | 633         | 627             | 0.412                                            | 0.2     | 109          |
| 15                      | 0.400                                        | 0.025                                            | 0.425                                        | 0.02           | 633         | 627             | 0.412                                            | 0.2     | 109          |
| 15                      | 0.400                                        | 0.025                                            | 0.425                                        | 0.03           | 633         | 627             | 0.412                                            | 0.2     | 109          |
| 15                      | 0.400                                        | 0.050                                            | 0.450                                        | 0.01           | 633         | 626             | 0.413                                            | 4.0     | 109          |
| 15                      | 0.400                                        | 0.050                                            | 0.450                                        | 0.02           | 633         | 621             | 0.423                                            | 0.2     | 109          |
| 15                      | 0.400                                        | 0.050                                            | 0.450                                        | 0.03           | 633         | 621             | 0.423                                            | 0.2     | 109          |
| 15                      | 0.400                                        | 0.100                                            | 0.500                                        | 0.01           | 633         | 626             | 0.413                                            | 27.9    | 109          |
| 15                      | 0.400                                        | 0.100                                            | 0.500                                        | 0.02           | 633         | 620             | 0.426                                            | 3.1     | 108          |
| 15                      | 0.400                                        | 0.100                                            | 0.500                                        | 0.03           | 633         | 614             | 0.440                                            | 0.5     | 108          |
| 15                      | 0.400                                        | 0.150                                            | 0.550                                        | 0.01           | 633         | 626             | 0.413                                            | 44.6    | 109          |
| 15                      | 0.400                                        | 0.150                                            | 0.550                                        | 0.02           | 633         | 620             | 0.427                                            | 13.3    | 108          |
| 15                      | 0.400                                        | 0.150                                            | 0.550                                        | 0.03           | 633         | 614             | 0.440                                            | 2.5     | 108          |
| 15                      | 0.400                                        | 0.200                                            | 0.600                                        | 0.01           | 633         | 626             | 0.413                                            | 57.5    | 109          |
| 15                      | 0.400                                        | 0.200                                            | 0.600                                        | 0.02           | 633         | 620             | 0.427                                            | 23.1    | 108          |
| 15                      | 0.400                                        | 0.200                                            | 0.600                                        | 0.03           | 633         | 614             | 0.441                                            | 7.1     | 108          |
| 15                      | 0.450                                        | 0.025                                            | 0.475                                        | 0.01           | 610         | 604             | 0.462                                            | 0.2     | 107          |
| 15                      | 0.450                                        | 0.025                                            | 0.475                                        | 0.02           | 610         | 604             | 0.462                                            | 0.2     | 107          |
| 15                      | 0.450                                        | 0.025                                            | 0.475                                        | 0.03           | 610         | 604             | 0.462                                            | 0.2     | 107          |
| 15                      | 0.450                                        | 0.050                                            | 0.500                                        | 0.01           | 610         | 603             | 0.464                                            | 2.6     | 107          |
| 15                      | 0.450                                        | 0.050                                            | 0.500                                        | 0.02           | 610         | 600             | 0.473                                            | 0.2     | 107          |
| 15                      | 0.450                                        | 0.050                                            | 0.500                                        | 0.03           | 610         | 600             | 0.473                                            | 0.2     | 107          |
| 15                      | 0.450                                        | 0.100                                            | 0.550                                        | 0.01           | 610         | 603             | 0.464                                            | 23.2    | 107          |
| 15                      | 0.450                                        | 0.100                                            | 0.550                                        | 0.02           | 610         | 597             | 0.479                                            | 2.1     | 106          |

| $h$ (g/m <sup>3</sup> ) | $\theta_1$ (m <sup>3</sup> /m <sup>3</sup> ) | $\Delta\theta$ (m <sup>3</sup> /m <sup>3</sup> ) | $\theta_2$ (m <sup>3</sup> /m <sup>3</sup> ) | $\sigma_N$ (-) | $N_1$ (cph) | $\hat{N}$ (cph) | $\hat{\theta}$ (m <sup>3</sup> /m <sup>3</sup> ) | $R$ (m) | $R_{86}$ (m) |
|-------------------------|----------------------------------------------|--------------------------------------------------|----------------------------------------------|----------------|-------------|-----------------|--------------------------------------------------|---------|--------------|
| 15                      | 0.450                                        | 0.100                                            | 0.550                                        | 0.03           | 610         | 592             | 0.494                                            | 0.3     | 106          |
| 15                      | 0.450                                        | 0.150                                            | 0.600                                        | 0.01           | 610         | 603             | 0.464                                            | 39.2    | 107          |
| 15                      | 0.450                                        | 0.150                                            | 0.600                                        | 0.02           | 610         | 597             | 0.479                                            | 9.6     | 106          |
| 15                      | 0.450                                        | 0.150                                            | 0.600                                        | 0.03           | 610         | 591             | 0.494                                            | 1.7     | 106          |
| 15                      | 0.450                                        | 0.200                                            | 0.650                                        | 0.01           | 610         | 603             | 0.464                                            | 51.2    | 107          |
| 15                      | 0.450                                        | 0.200                                            | 0.650                                        | 0.02           | 610         | 597             | 0.479                                            | 18.9    | 106          |
| 15                      | 0.450                                        | 0.200                                            | 0.650                                        | 0.03           | 610         | 591             | 0.495                                            | 4.6     | 106          |
| 15                      | 0.500                                        | 0.025                                            | 0.525                                        | 0.01           | 589         | 585             | 0.512                                            | 0.2     | 106          |
| 15                      | 0.500                                        | 0.025                                            | 0.525                                        | 0.02           | 589         | 585             | 0.512                                            | 0.2     | 106          |
| 15                      | 0.500                                        | 0.025                                            | 0.525                                        | 0.03           | 589         | 585             | 0.512                                            | 0.2     | 106          |
| 15                      | 0.500                                        | 0.050                                            | 0.550                                        | 0.01           | 589         | 583             | 0.515                                            | 1.9     | 106          |
| 15                      | 0.500                                        | 0.050                                            | 0.550                                        | 0.02           | 589         | 580             | 0.523                                            | 0.2     | 106          |
| 15                      | 0.500                                        | 0.050                                            | 0.550                                        | 0.03           | 589         | 580             | 0.523                                            | 0.2     | 106          |
| 15                      | 0.500                                        | 0.100                                            | 0.600                                        | 0.01           | 589         | 583             | 0.516                                            | 19.5    | 106          |
| 15                      | 0.500                                        | 0.100                                            | 0.600                                        | 0.02           | 589         | 578             | 0.531                                            | 1.6     | 106          |
| 15                      | 0.500                                        | 0.100                                            | 0.600                                        | 0.03           | 589         | 573             | 0.545                                            | 0.2     | 106          |
| 15                      | 0.500                                        | 0.150                                            | 0.650                                        | 0.01           | 589         | 583             | 0.516                                            | 35.2    | 106          |
| 15                      | 0.500                                        | 0.150                                            | 0.650                                        | 0.02           | 589         | 577             | 0.532                                            | 6.8     | 106          |
| 15                      | 0.500                                        | 0.150                                            | 0.650                                        | 0.03           | 589         | 572             | 0.548                                            | 1.3     | 106          |
| 15                      | 0.500                                        | 0.200                                            | 0.700                                        | 0.01           | 589         | 583             | 0.516                                            | 46.8    | 106          |
| 15                      | 0.500                                        | 0.200                                            | 0.700                                        | 0.02           | 589         | 577             | 0.532                                            | 15.6    | 106          |
| 15                      | 0.500                                        | 0.200                                            | 0.700                                        | 0.03           | 589         | 572             | 0.548                                            | 3.3     | 106          |
